# Supplementary material for: Discerning mechanistically rewired biological pathways by cumulative interaction heterogeneity statistics
Source: PubMed Central journal article supplement (PMC4894439; doi:10.1038/srep09634), 2015-04-28
Supplement: srep09634-s1.pdf [file srep09634-s1.pdf]

# SUPPLEMENTARY INFORMATION

## Discerning mechanistically rewired biological pathways by cumulative interaction heterogeneity statistics

Travis B. Cotton<sup>1,3</sup>, Hien H. Nguyen<sup>1</sup>, Joseph I. Said<sup>2</sup>, Zhengyu Ouyang<sup>1,4</sup>, Jinfa Zhang<sup>2</sup> and Mingzhou Song<sup>1,\*</sup>

<sup>1</sup> Department of Computer Science, New Mexico State University, Las Cruces, New Mexico, USA

<sup>2</sup> Department of Plant and Environmental Sciences, New Mexico State University, Las Cruces, New Mexico, USA

Current addresses:

<sup>3</sup> High Performance Computing Center, Texas Tech University, Lubbock, Texas, USA

<sup>4</sup> Ragon Institute of Massachusetts General Hospital, MIT and Harvard University, Cambridge, Massachusetts, USA

\* To whom correspondence may be addressed: joemsong@cs.nmsu.edu

### Contents

|          |                                                                                                       |           |
|----------|-------------------------------------------------------------------------------------------------------|-----------|
| <b>1</b> | <b>Supplementary Figures</b>                                                                          | <b>1</b>  |
| <b>2</b> | <b>Supplementary Tables</b>                                                                           | <b>6</b>  |
| <b>3</b> | <b>Supplementary Text</b>                                                                             | <b>19</b> |
| 3.1      | Dynamical system model reconstruction . . . . .                                                       | 19        |
| 3.2      | Comparable performance of GSCA and the $Q$ -method at various noise levels . . . . .                  | 19        |
| 3.3      | Predicting rewired pathways among four yeast species . . . . .                                        | 20        |
| 3.3.1    | TATA box detection . . . . .                                                                          | 21        |
| 3.3.2    | Pathway TATA box disparity . . . . .                                                                  | 21        |
| 3.3.3    | Normalized pathway interaction heterogeneity . . . . .                                                | 22        |
| 3.3.4    | Pathway interaction heterogeneity is consistent with TATA box disparity among yeast species . . . . . | 22        |

### 1 Supplementary Figures

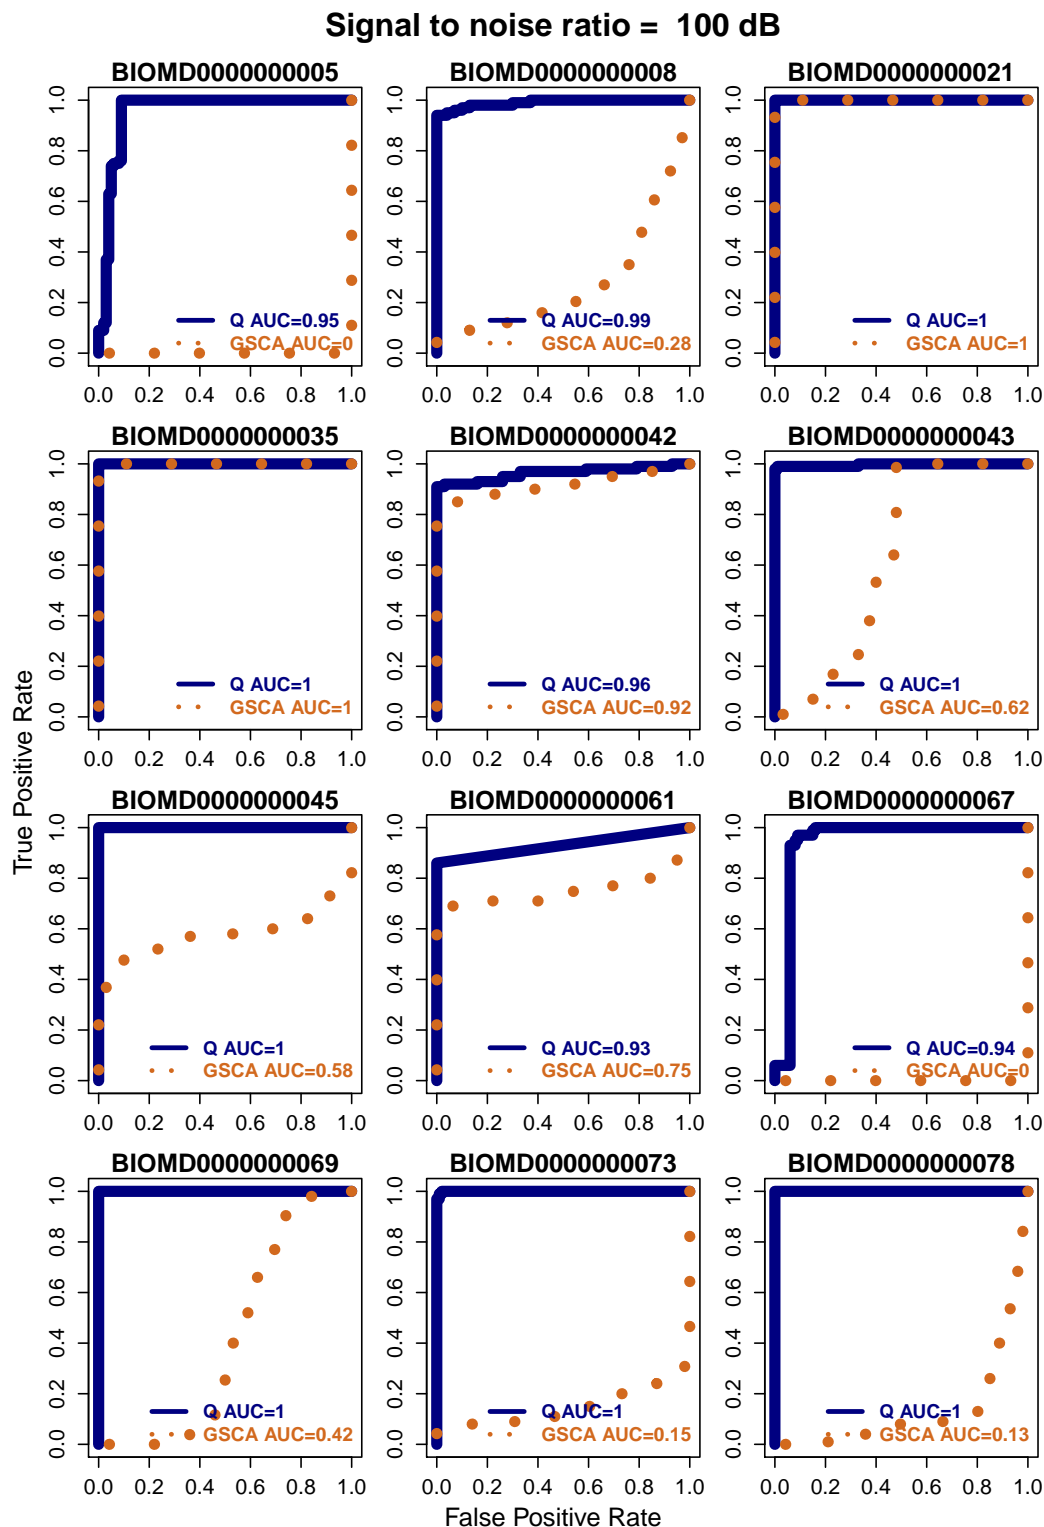

**Figure S1.** The ROC curves of the  $Q$ -method (blue) and Gene Set Correlation Analysis (GSCA) (orange) at a signal-to-noise ratio (SNR) of 100 dB. At this level the  $Q$ -method is almost perfect but GSCA performed far worse except in three models. The results were obtained on data at 100 dB from 12 BioModels (Chelliah et al., 2013). Each plot summarizes 100 conserved and 100 differential model pairs based on one original model among the 12 BioModels. AUC in the legends stands for area under ROC curve. A larger AUC indicates a better performance.

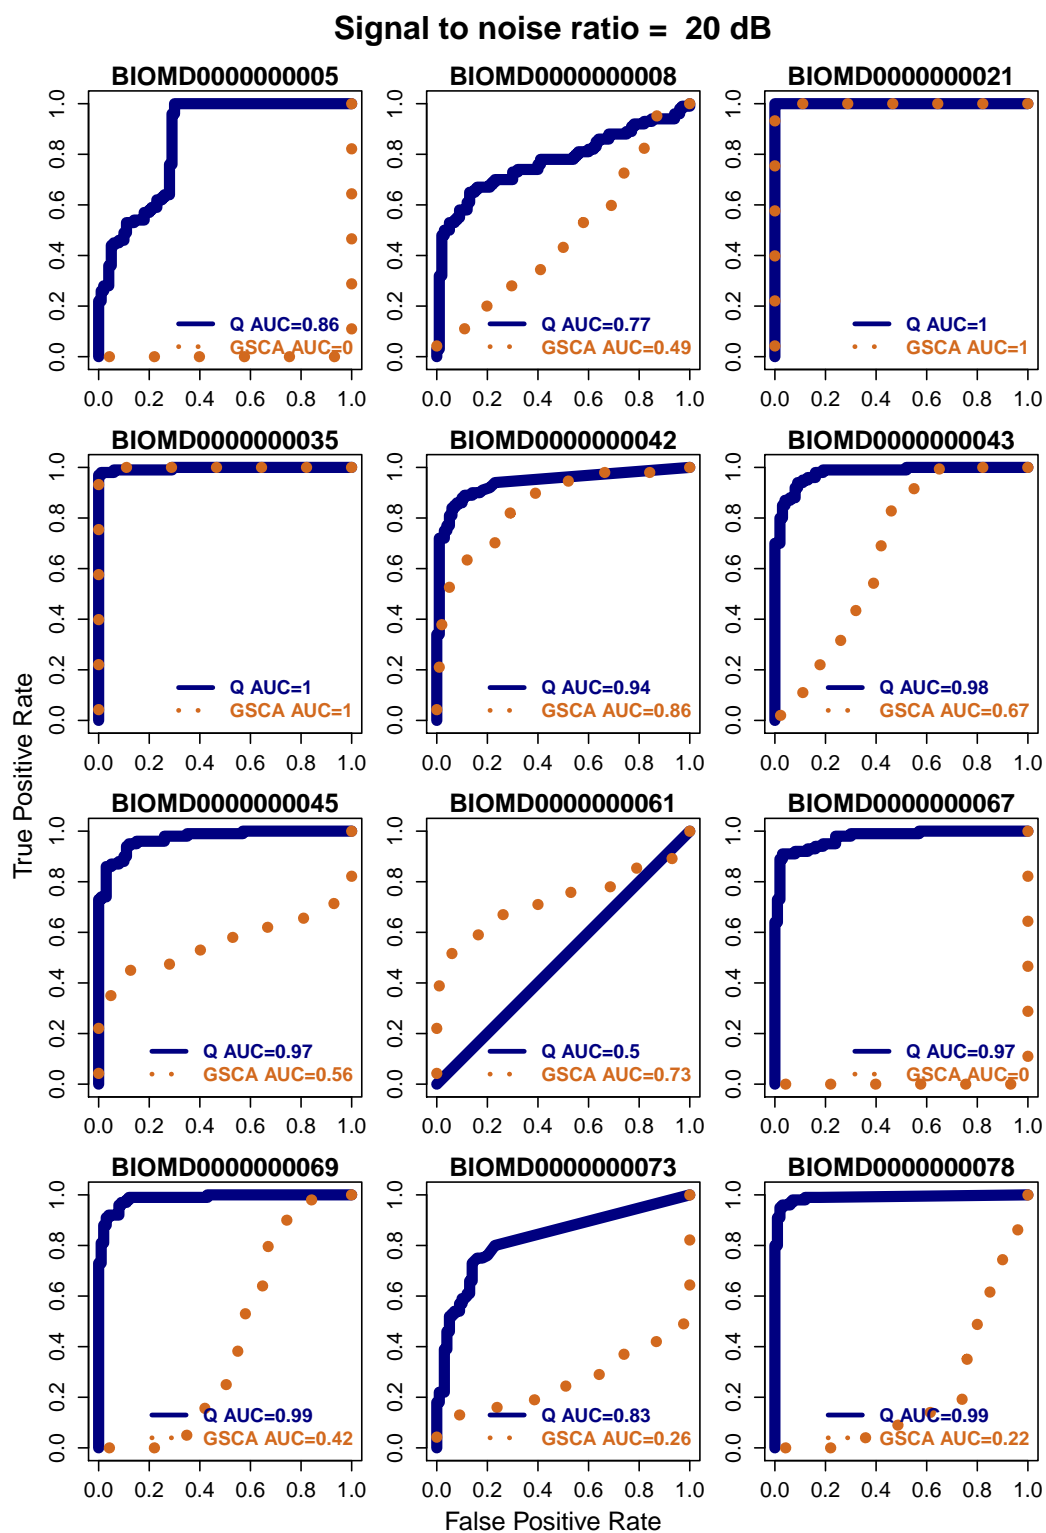

**Figure S2.** The ROC curves of the  $Q$ -method (blue) and GSCA (orange) at a signal-to-noise ratio of 20 dB. At this level the  $Q$ -method outperformed GSCA considerably on 8 models and was equal or slightly better in 4 models.

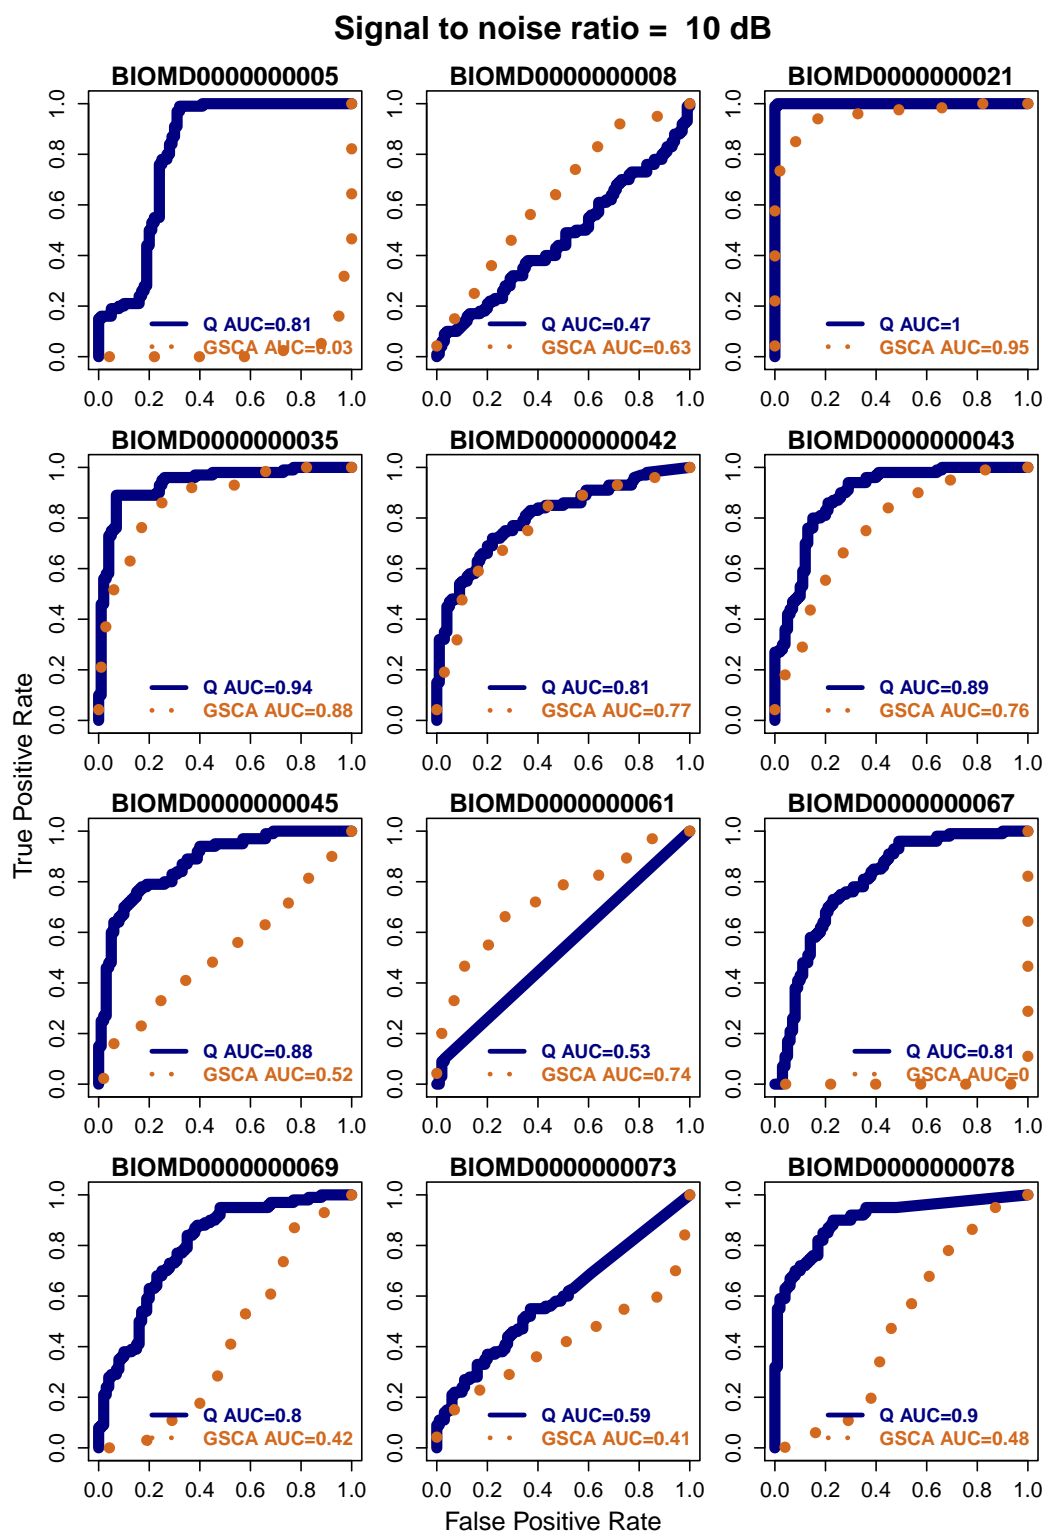

**Figure S3.** The ROC curves of the  $Q$ -method (blue) and GSCA (orange) at a signal-to-noise ratio of 10 dB. At this level the  $Q$ -method outperformed GSCA on 9 models and slightly underperformed in 3 models.

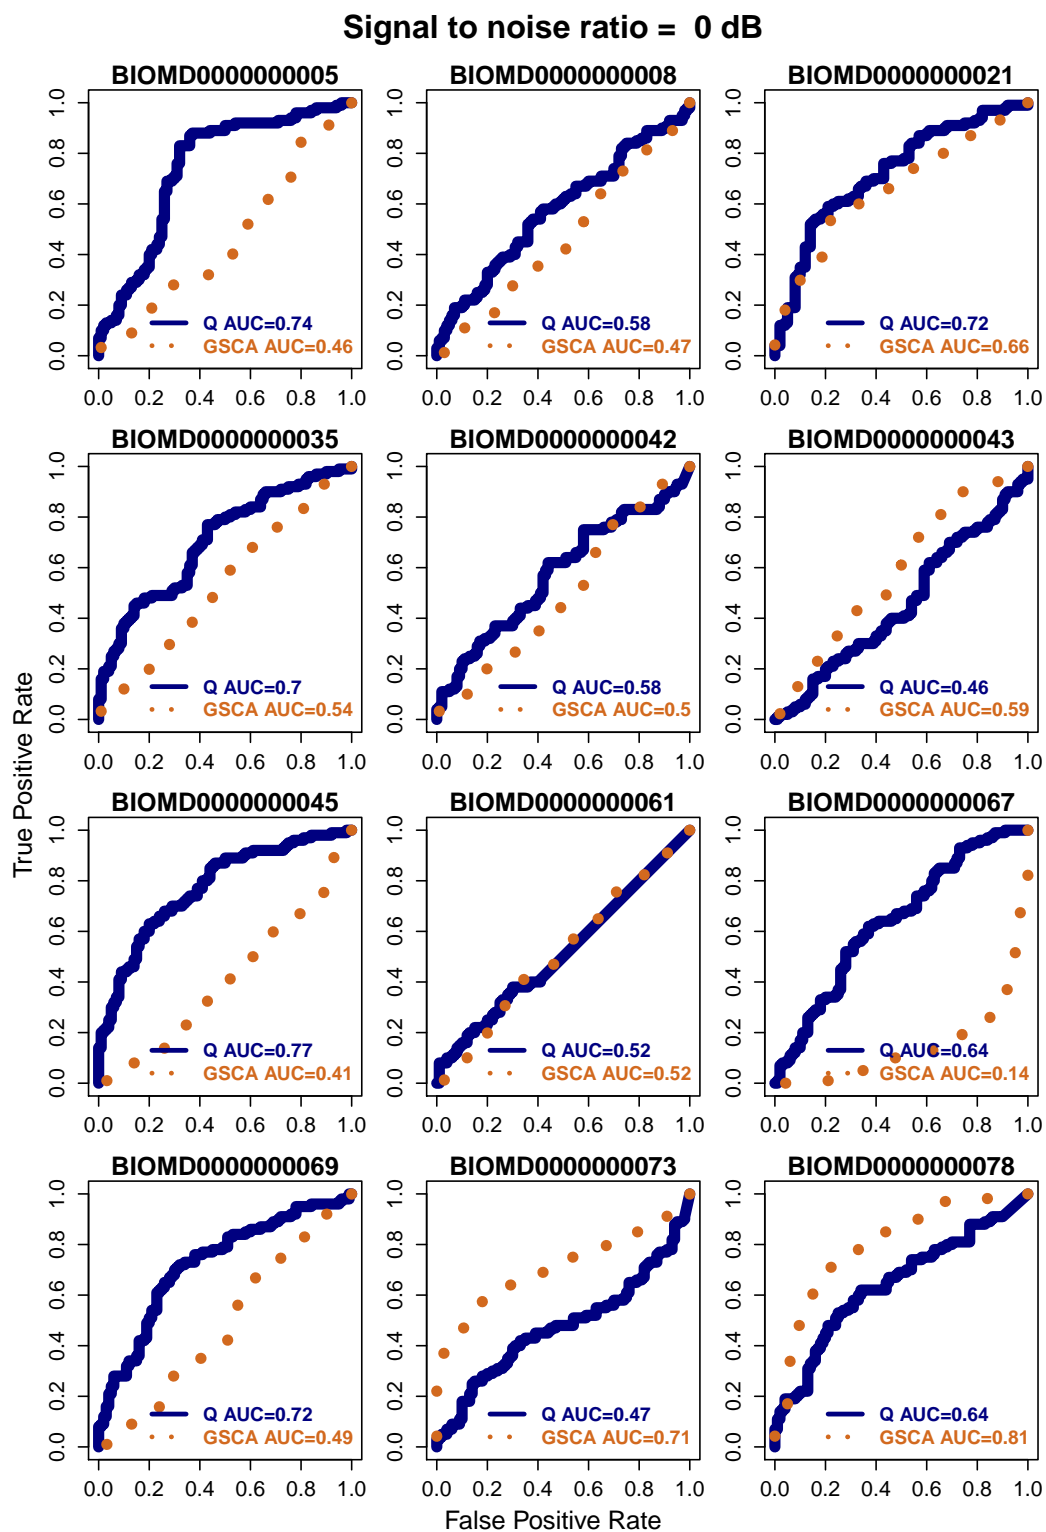

**Figure S4.** The ROC curves of the *Q*-method (blue) and GSCA (orange) at a signal-to-noise ratio of **0 dB**. At this level the *Q*-method outperformed GSCA on 8 models and underperformed in 4 models.

## 2 Supplementary Tables

**Table S1. Prioritized pathways ranked by median heterogeneity among the four yeast species.** The pathway heterogeneity  $Q_d^*$  is the median taken over the six pairs among the four yeast species from Table S4.

| Pathway ID | Pathway Name                                          | Median normalized pathway heterogeneity $Q_d^*$ among four yeast species |
|------------|-------------------------------------------------------|--------------------------------------------------------------------------|
| sce00513   | Various types of N-glycan biosynthesis                | 5.57                                                                     |
| sce00785   | Lipoic acid metabolism                                | 4.98                                                                     |
| sce00350   | Tyrosine metabolism                                   | 3.76                                                                     |
| sce00360   | Phenylalanine metabolism                              | 3.14                                                                     |
| sce00910   | Nitrogen metabolism                                   | 2.52                                                                     |
| sce04144   | Endocytosis                                           | 2.45                                                                     |
| sce00790   | Folate biosynthesis                                   | 2.36                                                                     |
| sce00920   | Sulfur metabolism                                     | 2.19                                                                     |
| sce00562   | Inositol phosphate metabolism                         | 1.98                                                                     |
| sce00290   | Valine, leucine and isoleucine biosynthesis           | 1.93                                                                     |
| sce00750   | Vitamin B6 metabolism                                 | 1.76                                                                     |
| sce04145   | Phagosome                                             | 1.72                                                                     |
| sce04122   | Sulfur relay system                                   | 1.66                                                                     |
| sce00650   | Butanoate metabolism                                  | 1.60                                                                     |
| sce00561   | Glycerolipid metabolism                               | 1.59                                                                     |
| sce00970   | Aminoacyl-tRNA biosynthesis                           | 1.57                                                                     |
| sce00909   | Sesquiterpenoid biosynthesis                          | 1.45                                                                     |
| sce04130   | SNARE interactions in vesicular transport             | 1.40                                                                     |
| sce00450   | Selenocompound metabolism                             | 0.96                                                                     |
| sce00500   | Starch and sucrose metabolism                         | 0.93                                                                     |
| sce00071   | Fatty acid metabolism                                 | 0.88                                                                     |
| sce00780   | Biotin metabolism                                     | 0.87                                                                     |
| sce00280   | Valine, leucine and isoleucine degradation            | 0.86                                                                     |
| sce00061   | Fatty acid biosynthesis                               | 0.74                                                                     |
| sce00565   | Ether lipid metabolism                                | 0.69                                                                     |
| sce00340   | Histidine metabolism                                  | 0.67                                                                     |
| sce00630   | Glyoxylate and dicarboxylate metabolism               | 0.53                                                                     |
| sce00062   | Fatty acid elongation in mitochondria                 | 0.50                                                                     |
| sce03018   | RNA degradation                                       | 0.46                                                                     |
| sce04070   | Phosphatidylinositol signaling system                 | 0.16                                                                     |
| sce00040   | Pentose and glucuronate interconversions              | 0.06                                                                     |
| sce03015   | mRNA surveillance pathway                             | -0.21                                                                    |
| sce00300   | Lysine biosynthesis                                   | -0.27                                                                    |
| sce00510   | N-Glycan biosynthesis                                 | -0.27                                                                    |
| sce00730   | Thiamine metabolism                                   | -0.33                                                                    |
| sce04141   | Protein processing in endoplasmic reticulum           | -0.56                                                                    |
| sce00100   | Steroid biosynthesis                                  | -0.56                                                                    |
| sce00410   | beta-Alanine metabolism                               | -0.61                                                                    |
| sce00380   | Tryptophan metabolism                                 | -0.75                                                                    |
| sce00900   | Terpenoid backbone biosynthesis                       | -0.83                                                                    |
| sce00051   | Fructose and mannose metabolism                       | -1.02                                                                    |
| sce00600   | Sphingolipid metabolism                               | -1.30                                                                    |
| sce00563   | Glycosylphosphatidylinositol(GPI)-anchor biosynthesis | -1.34                                                                    |
| sce03013   | RNA transport                                         | -1.37                                                                    |
| sce00860   | Porphyrin and chlorophyll metabolism                  | -1.43                                                                    |
| sce00520   | Amino sugar and nucleotide sugar metabolism           | -1.80                                                                    |
| sce00400   | Phenylalanine, tyrosine and tryptophan biosynthesis   | -1.93                                                                    |

|          |                                             |        |
|----------|---------------------------------------------|--------|
| sce00670 | One carbon pool by folate                   | -2.25  |
| sce00680 | Methane metabolism                          | -2.38  |
| sce00330 | Arginine and proline metabolism             | -2.38  |
| sce00620 | Pyruvate metabolism                         | -2.45  |
| sce00564 | Glycerophospholipid metabolism              | -2.50  |
| sce00480 | Glutathione metabolism                      | -2.51  |
| sce00770 | Pantothenate and CoA biosynthesis           | -2.60  |
| sce00250 | Alanine, aspartate and glutamate metabolism | -2.61  |
| sce00760 | Nicotinate and nicotinamide metabolism      | -2.63  |
| sce00740 | Riboflavin metabolism                       | -2.74  |
| sce00260 | Glycine, serine and threonine metabolism    | -2.74  |
| sce04011 | MAPK signaling pathway - yeast              | -2.82  |
| sce00030 | Pentose phosphate pathway                   | -4.20  |
| sce00052 | Galactose metabolism                        | -4.32  |
| sce03008 | Ribosome biogenesis in eukaryotes           | -4.53  |
| sce00010 | Glycolysis / Gluconeogenesis                | -6.44  |
| sce00020 | Citrate cycle (TCA cycle)                   | -6.53  |
| sce00270 | Cysteine and methionine metabolism          | -6.58  |
| sce00240 | Pyrimidine metabolism                       | -7.98  |
| sce04113 | Meiosis - yeast                             | -10.30 |
| sce04111 | Cell cycle - yeast                          | -10.63 |



**Table S2. Pathway heterogeneity across yeast species.** The pathway heterogeneity  $Q_d^*$  is normalized from  $Q_d$ -statistics. The pathway TATA box disparity is calculated as the ratio of the number of TATA-containing genes in only one species (in 2 compared species) and the number of TATA-containing genes in either one of 2 compared species.

| Pathway ID | Pathway Name                                        | Species 1     | Species 2       | Normalized pathway heterogeneity $Q_d^*$ | Pathway TATA box disparity |
|------------|-----------------------------------------------------|---------------|-----------------|------------------------------------------|----------------------------|
| sce00513   | Various types of N-glycan biosynthesis              | S. cerevisiae | S. paradoxus    | 10.68                                    | 0.77                       |
| sce00790   | Folate biosynthesis                                 | S. cerevisiae | S. paradoxus    | 9.65                                     | 1.00                       |
| sce00910   | Nitrogen metabolism                                 | S. paradoxus  | S. kudriavzevii | 7.54                                     | 1.00                       |
| sce00630   | Glyoxylate and dicarboxylate metabolism             | S. paradoxus  | S. kudriavzevii | 7.15                                     | 1.00                       |
| sce00513   | Various types of N-glycan biosynthesis              | S. paradoxus  | S. mikatae      | 7.29                                     | 0.80                       |
| sce00790   | Folate biosynthesis                                 | S. cerevisiae | S. mikatae      | 6.95                                     | 1.00                       |
| sce00350   | Tyrosine metabolism                                 | S. paradoxus  | S. kudriavzevii | 6.89                                     | 0.80                       |
| sce00051   | Fructose and mannose metabolism                     | S. paradoxus  | S. kudriavzevii | 6.21                                     | 1.00                       |
| sce00910   | Nitrogen metabolism                                 | S. mikatae    | S. kudriavzevii | 6.39                                     | 1.00                       |
| sce00620   | Pyruvate metabolism                                 | S. paradoxus  | S. kudriavzevii | 5.82                                     | 0.69                       |
| sce00785   | Lipoic acid metabolism                              | S. cerevisiae | S. paradoxus    | 6.43                                     | 0.83                       |
| sce00270   | Cysteine and methionine metabolism                  | S. paradoxus  | S. mikatae      | 5.42                                     | 0.75                       |
| sce00513   | Various types of N-glycan biosynthesis              | S. paradoxus  | S. kudriavzevii | 5.96                                     | 1.00                       |
| sce00562   | Inositol phosphate metabolism                       | S. paradoxus  | S. kudriavzevii | 5.60                                     | 1.00                       |
| sce00785   | Lipoic acid metabolism                              | S. cerevisiae | S. kudriavzevii | 5.70                                     | 0.80                       |
| sce00562   | Inositol phosphate metabolism                       | S. cerevisiae | S. kudriavzevii | 5.41                                     | 0.85                       |
| sce00500   | Starch and sucrose metabolism                       | S. paradoxus  | S. kudriavzevii | 5.14                                     | 0.67                       |
| sce00350   | Tyrosine metabolism                                 | S. mikatae    | S. kudriavzevii | 5.55                                     | 0.70                       |
| sce00062   | Fatty acid elongation in mitochondria               | S. cerevisiae | S. paradoxus    | 5.53                                     | 0.70                       |
| sce00513   | Various types of N-glycan biosynthesis              | S. cerevisiae | S. mikatae      | 5.19                                     | 0.77                       |
| sce00785   | Lipoic acid metabolism                              | S. cerevisiae | S. mikatae      | 5.08                                     | 0.80                       |
| sce00785   | Lipoic acid metabolism                              | S. paradoxus  | S. kudriavzevii | 4.88                                     | 1.00                       |
| sce00562   | Inositol phosphate metabolism                       | S. mikatae    | S. kudriavzevii | 4.51                                     | 0.90                       |
| sce00513   | Various types of N-glycan biosynthesis              | S. cerevisiae | S. kudriavzevii | 4.57                                     | 0.75                       |
| sce00290   | Valine, leucine and isoleucine biosynthesis         | S. mikatae    | S. kudriavzevii | 4.25                                     | 0.75                       |
| sce00510   | N-Glycan biosynthesis                               | S. paradoxus  | S. kudriavzevii | 4.04                                     | 1.00                       |
| sce00400   | Phenylalanine, tyrosine and tryptophan biosynthesis | S. cerevisiae | S. paradoxus    | 3.90                                     | 0.83                       |
| sce00350   | Tyrosine metabolism                                 | S. cerevisiae | S. kudriavzevii | 4.11                                     | 0.83                       |
| sce00513   | Various types of N-glycan biosynthesis              | S. mikatae    | S. kudriavzevii | 3.88                                     | 1.00                       |
| sce00360   | Phenylalanine metabolism                            | S. paradoxus  | S. kudriavzevii | 4.01                                     | 0.83                       |
| sce04145   | Phagosome                                           | S. cerevisiae | S. paradoxus    | 4.15                                     | 0.67                       |
| sce00051   | Fructose and mannose metabolism                     | S. mikatae    | S. kudriavzevii | 3.56                                     | 1.00                       |
| sce00340   | Histidine metabolism                                | S. cerevisiae | S. paradoxus    | 3.69                                     | 0.88                       |
| sce00670   | One carbon pool by folate                           | S. paradoxus  | S. kudriavzevii | 3.56                                     | 1.00                       |
| sce00565   | Ether lipid metabolism                              | S. paradoxus  | S. mikatae      | 4.02                                     | 1.00                       |
| sce04122   | Sulfur relay system                                 | S. paradoxus  | S. mikatae      | 3.77                                     | 0.86                       |
| sce00630   | Glyoxylate and dicarboxylate metabolism             | S. cerevisiae | S. kudriavzevii | 3.40                                     | 0.75                       |
| sce00730   | Thiamine metabolism                                 | S. cerevisiae | S. mikatae      | 3.50                                     | 0.69                       |
| sce00600   | Sphingolipid metabolism                             | S. cerevisiae | S. paradoxus    | 3.49                                     | 0.86                       |
| sce00970   | Aminoacyl-tRNA biosynthesis                         | S. paradoxus  | S. mikatae      | 3.58                                     | 1.00                       |
| sce00790   | Folate biosynthesis                                 | S. paradoxus  | S. mikatae      | 3.46                                     | 1.00                       |
| sce00360   | Phenylalanine metabolism                            | S. cerevisiae | S. paradoxus    | 3.44                                     | 1.00                       |
| sce00290   | Valine, leucine and isoleucine biosynthesis         | S. paradoxus  | S. kudriavzevii | 3.34                                     | 1.00                       |
| sce00970   | Aminoacyl-tRNA biosynthesis                         | S. cerevisiae | S. paradoxus    | 3.37                                     | 0.80                       |
| sce00360   | Phenylalanine metabolism                            | S. cerevisiae | S. mikatae      | 3.36                                     | 1.00                       |

|          |                                             |                      |                        |      |      |
|----------|---------------------------------------------|----------------------|------------------------|------|------|
| sce00750 | Vitamin B6 metabolism                       | <i>S. cerevisiae</i> | <i>S. kudriavzevii</i> | 3.27 | 0.56 |
| sce04144 | Endocytosis                                 | <i>S. paradoxus</i>  | <i>S. kudriavzevii</i> | 3.39 | 1.00 |
| sce00410 | beta-Alanine metabolism                     | <i>S. paradoxus</i>  | <i>S. mikatae</i>      | 3.16 | 0.96 |
| sce04122 | Sulfur relay system                         | <i>S. cerevisiae</i> | <i>S. paradoxus</i>    | 3.55 | 0.82 |
| sce00350 | Tyrosine metabolism                         | <i>S. paradoxus</i>  | <i>S. mikatae</i>      | 3.41 | 0.93 |
| sce00040 | Pentose and glucuronate interconversions    | <i>S. cerevisiae</i> | <i>S. paradoxus</i>    | 3.25 | 0.87 |
| sce00561 | Glycerolipid metabolism                     | <i>S. cerevisiae</i> | <i>S. paradoxus</i>    | 3.13 | 0.90 |
| sce00780 | Biotin metabolism                           | <i>S. paradoxus</i>  | <i>S. mikatae</i>      | 3.16 | 0.73 |
| sce00970 | Aminoacyl-tRNA biosynthesis                 | <i>S. paradoxus</i>  | <i>S. kudriavzevii</i> | 3.16 | 1.00 |
| sce00920 | Sulfur metabolism                           | <i>S. cerevisiae</i> | <i>S. kudriavzevii</i> | 2.97 | 1.00 |
| sce04130 | SNARE interactions in vesicular transport   | <i>S. paradoxus</i>  | <i>S. kudriavzevii</i> | 2.86 | 1.00 |
| sce00360 | Phenylalanine metabolism                    | <i>S. mikatae</i>    | <i>S. kudriavzevii</i> | 2.92 | 0.72 |
| sce00561 | Glycerolipid metabolism                     | <i>S. cerevisiae</i> | <i>S. kudriavzevii</i> | 2.72 | 1.00 |
| sce04070 | Phosphatidylinositol signaling system       | <i>S. cerevisiae</i> | <i>S. paradoxus</i>    | 2.66 | 0.85 |
| sce04144 | Endocytosis                                 | <i>S. mikatae</i>    | <i>S. kudriavzevii</i> | 2.75 | 0.92 |
| sce00280 | Valine, leucine and isoleucine degradation  | <i>S. cerevisiae</i> | <i>S. kudriavzevii</i> | 2.73 | 0.81 |
| sce04144 | Endocytosis                                 | <i>S. cerevisiae</i> | <i>S. kudriavzevii</i> | 2.69 | 0.80 |
| sce00350 | Tyrosine metabolism                         | <i>S. cerevisiae</i> | <i>S. paradoxus</i>    | 2.71 | 0.89 |
| sce00290 | Valine, leucine and isoleucine biosynthesis | <i>S. cerevisiae</i> | <i>S. kudriavzevii</i> | 2.55 | 0.75 |
| sce00360 | Phenylalanine metabolism                    | <i>S. cerevisiae</i> | <i>S. kudriavzevii</i> | 2.64 | 0.88 |
| sce04141 | Protein processing in endoplasmic reticulum | <i>S. cerevisiae</i> | <i>S. paradoxus</i>    | 2.53 | 0.87 |
| sce00910 | Nitrogen metabolism                         | <i>S. cerevisiae</i> | <i>S. kudriavzevii</i> | 2.53 | 0.95 |
| sce00785 | Lipoic acid metabolism                      | <i>S. paradoxus</i>  | <i>S. mikatae</i>      | 2.58 | 0.98 |
| sce00910 | Nitrogen metabolism                         | <i>S. cerevisiae</i> | <i>S. mikatae</i>      | 2.52 | 0.67 |
| sce04130 | SNARE interactions in vesicular transport   | <i>S. cerevisiae</i> | <i>S. paradoxus</i>    | 2.41 | 0.65 |
| sce00500 | Starch and sucrose metabolism               | <i>S. mikatae</i>    | <i>S. kudriavzevii</i> | 2.24 | 0.67 |
| sce00450 | Selenocompound metabolism                   | <i>S. cerevisiae</i> | <i>S. paradoxus</i>    | 2.38 | 0.57 |
| sce00920 | Sulfur metabolism                           | <i>S. cerevisiae</i> | <i>S. paradoxus</i>    | 2.22 | 0.67 |
| sce00520 | Amino sugar and nucleotide sugar metabolism | <i>S. cerevisiae</i> | <i>S. paradoxus</i>    | 2.16 | 0.83 |
| sce00920 | Sulfur metabolism                           | <i>S. cerevisiae</i> | <i>S. mikatae</i>      | 2.16 | 0.71 |
| sce00650 | Butanoate metabolism                        | <i>S. cerevisiae</i> | <i>S. kudriavzevii</i> | 2.17 | 0.53 |
| sce00750 | Vitamin B6 metabolism                       | <i>S. cerevisiae</i> | <i>S. mikatae</i>      | 2.11 | 0.62 |
| sce00750 | Vitamin B6 metabolism                       | <i>S. cerevisiae</i> | <i>S. paradoxus</i>    | 2.10 | 0.69 |
| sce04145 | Phagosome                                   | <i>S. paradoxus</i>  | <i>S. mikatae</i>      | 2.07 | 0.76 |
| sce00500 | Starch and sucrose metabolism               | <i>S. cerevisiae</i> | <i>S. kudriavzevii</i> | 1.91 | 0.67 |
| sce00260 | Glycine, serine and threonine metabolism    | <i>S. cerevisiae</i> | <i>S. paradoxus</i>    | 1.95 | 1.00 |
| sce00909 | Sesquiterpenoid biosynthesis                | <i>S. cerevisiae</i> | <i>S. mikatae</i>      | 2.10 | 0.75 |
| sce00770 | Pantothenate and CoA biosynthesis           | <i>S. paradoxus</i>  | <i>S. mikatae</i>      | 1.95 | 0.69 |
| sce00260 | Glycine, serine and threonine metabolism    | <i>S. cerevisiae</i> | <i>S. mikatae</i>      | 1.91 | 0.64 |
| sce00340 | Histidine metabolism                        | <i>S. paradoxus</i>  | <i>S. kudriavzevii</i> | 1.93 | 0.75 |
| sce00650 | Butanoate metabolism                        | <i>S. cerevisiae</i> | <i>S. paradoxus</i>    | 1.93 | 0.63 |
| sce03015 | mRNA surveillance pathway                   | <i>S. paradoxus</i>  | <i>S. kudriavzevii</i> | 1.93 | 1.00 |
| sce00561 | Glycerolipid metabolism                     | <i>S. cerevisiae</i> | <i>S. mikatae</i>      | 1.86 | 0.61 |
| sce00650 | Butanoate metabolism                        | <i>S. mikatae</i>    | <i>S. kudriavzevii</i> | 1.84 | 1.00 |
| sce00785 | Lipoic acid metabolism                      | <i>S. mikatae</i>    | <i>S. kudriavzevii</i> | 1.80 | 0.67 |
| sce00071 | Fatty acid metabolism                       | <i>S. cerevisiae</i> | <i>S. paradoxus</i>    | 1.81 | 0.57 |
| sce04145 | Phagosome                                   | <i>S. cerevisiae</i> | <i>S. mikatae</i>      | 1.79 | 0.66 |
| sce00909 | Sesquiterpenoid biosynthesis                | <i>S. cerevisiae</i> | <i>S. paradoxus</i>    | 1.79 | 0.57 |
| sce00300 | Lysine biosynthesis                         | <i>S. paradoxus</i>  | <i>S. mikatae</i>      | 1.69 | 0.74 |
| sce04122 | Sulfur relay system                         | <i>S. cerevisiae</i> | <i>S. kudriavzevii</i> | 1.75 | 0.70 |
| sce00730 | Thiamine metabolism                         | <i>S. cerevisiae</i> | <i>S. paradoxus</i>    | 1.67 | 1.00 |
| sce04145 | Phagosome                                   | <i>S. mikatae</i>    | <i>S. kudriavzevii</i> | 1.66 | 0.57 |
| sce04130 | SNARE interactions in vesicular transport   | <i>S. paradoxus</i>  | <i>S. mikatae</i>      | 1.62 | 0.67 |
| sce00760 | Nicotinate and nicotinamide metabolism      | <i>S. cerevisiae</i> | <i>S. paradoxus</i>    | 1.55 | 0.62 |
| sce04122 | Sulfur relay system                         | <i>S. paradoxus</i>  | <i>S. kudriavzevii</i> | 1.57 | 0.75 |
| sce00909 | Sesquiterpenoid biosynthesis                | <i>S. cerevisiae</i> | <i>S. kudriavzevii</i> | 1.55 | 1.00 |

|          |                                                       |                      |                        |      |      |
|----------|-------------------------------------------------------|----------------------|------------------------|------|------|
| sce00565 | Ether lipid metabolism                                | <i>S. cerevisiae</i> | <i>S. mikatae</i>      | 1.57 | 0.64 |
| sce00510 | N-Glycan biosynthesis                                 | <i>S. cerevisiae</i> | <i>S. paradoxus</i>    | 1.50 | 1.00 |
| sce00280 | Valine, leucine and isoleucine degradation            | <i>S. paradoxus</i>  | <i>S. mikatae</i>      | 1.48 | 0.88 |
| sce00750 | Vitamin B6 metabolism                                 | <i>S. paradoxus</i>  | <i>S. kudriavzevii</i> | 1.43 | 0.73 |
| sce00780 | Biotin metabolism                                     | <i>S. cerevisiae</i> | <i>S. mikatae</i>      | 1.41 | 1.00 |
| sce00780 | Biotin metabolism                                     | <i>S. cerevisiae</i> | <i>S. paradoxus</i>    | 1.40 | 0.50 |
| sce03015 | mRNA surveillance pathway                             | <i>S. cerevisiae</i> | <i>S. paradoxus</i>    | 1.39 | 0.61 |
| sce04122 | Sulfur relay system                                   | <i>S. cerevisiae</i> | <i>S. mikatae</i>      | 1.41 | 0.85 |
| sce00650 | Butanoate metabolism                                  | <i>S. paradoxus</i>  | <i>S. kudriavzevii</i> | 1.37 | 0.76 |
| sce00909 | Sesquiterpenoid biosynthesis                          | <i>S. mikatae</i>    | <i>S. kudriavzevii</i> | 1.35 | 0.75 |
| sce00561 | Glycerolipid metabolism                               | <i>S. paradoxus</i>  | <i>S. kudriavzevii</i> | 1.33 | 0.71 |
| sce00290 | Valine, leucine and isoleucine biosynthesis           | <i>S. cerevisiae</i> | <i>S. paradoxus</i>    | 1.32 | 1.00 |
| sce04144 | Endocytosis                                           | <i>S. cerevisiae</i> | <i>S. mikatae</i>      | 1.32 | 0.64 |
| sce00790 | Folate biosynthesis                                   | <i>S. cerevisiae</i> | <i>S. kudriavzevii</i> | 1.25 | 0.67 |
| sce00071 | Fatty acid metabolism                                 | <i>S. paradoxus</i>  | <i>S. mikatae</i>      | 1.23 | 0.62 |
| sce00630 | Glyoxylate and dicarboxylate metabolism               | <i>S. mikatae</i>    | <i>S. kudriavzevii</i> | 1.22 | 0.75 |
| sce00061 | Fatty acid biosynthesis                               | <i>S. cerevisiae</i> | <i>S. kudriavzevii</i> | 1.22 | 0.64 |
| sce04130 | SNARE interactions in vesicular transport             | <i>S. mikatae</i>    | <i>S. kudriavzevii</i> | 1.19 | 1.00 |
| sce00450 | Selenocompound metabolism                             | <i>S. cerevisiae</i> | <i>S. mikatae</i>      | 1.13 | 0.79 |
| sce00450 | Selenocompound metabolism                             | <i>S. paradoxus</i>  | <i>S. mikatae</i>      | 1.12 | 0.71 |
| sce00565 | Ether lipid metabolism                                | <i>S. cerevisiae</i> | <i>S. paradoxus</i>    | 1.13 | 1.00 |
| sce00563 | Glycosylphosphatidylinositol(GPI)-anchor biosynthesis | <i>S. paradoxus</i>  | <i>S. kudriavzevii</i> | 1.11 | 0.47 |
| sce00071 | Fatty acid metabolism                                 | <i>S. paradoxus</i>  | <i>S. kudriavzevii</i> | 1.09 | 0.67 |
| sce00280 | Valine, leucine and isoleucine degradation            | <i>S. cerevisiae</i> | <i>S. mikatae</i>      | 1.08 | 0.80 |
| sce00620 | Pyruvate metabolism                                   | <i>S. mikatae</i>    | <i>S. kudriavzevii</i> | 1.08 | 0.68 |
| sce04145 | Phagosome                                             | <i>S. paradoxus</i>  | <i>S. kudriavzevii</i> | 1.07 | 0.76 |
| sce00750 | Vitamin B6 metabolism                                 | <i>S. paradoxus</i>  | <i>S. mikatae</i>      | 1.04 | 0.65 |
| sce00350 | Tyrosine metabolism                                   | <i>S. cerevisiae</i> | <i>S. mikatae</i>      | 1.00 | 0.72 |
| sce00380 | Tryptophan metabolism                                 | <i>S. paradoxus</i>  | <i>S. kudriavzevii</i> | 1.01 | 0.65 |
| sce00564 | Glycerophospholipid metabolism                        | <i>S. paradoxus</i>  | <i>S. kudriavzevii</i> | 1.00 | 0.76 |
| sce00062 | Fatty acid elongation in mitochondria                 | <i>S. paradoxus</i>  | <i>S. mikatae</i>      | 0.99 | 0.72 |
| sce00860 | Porphyrin and chlorophyll metabolism                  | <i>S. paradoxus</i>  | <i>S. kudriavzevii</i> | 0.98 | 0.67 |
| sce00062 | Fatty acid elongation in mitochondria                 | <i>S. paradoxus</i>  | <i>S. kudriavzevii</i> | 0.97 | 0.67 |
| sce03018 | RNA degradation                                       | <i>S. cerevisiae</i> | <i>S. paradoxus</i>    | 0.96 | 0.71 |
| sce00680 | Methane metabolism                                    | <i>S. paradoxus</i>  | <i>S. mikatae</i>      | 0.95 | 0.50 |
| sce00909 | Sesquiterpenoid biosynthesis                          | <i>S. paradoxus</i>  | <i>S. kudriavzevii</i> | 0.90 | 0.70 |
| sce00061 | Fatty acid biosynthesis                               | <i>S. cerevisiae</i> | <i>S. mikatae</i>      | 0.89 | 0.59 |
| sce00360 | Phenylalanine metabolism                              | <i>S. paradoxus</i>  | <i>S. mikatae</i>      | 0.88 | 0.58 |
| sce03018 | RNA degradation                                       | <i>S. paradoxus</i>  | <i>S. mikatae</i>      | 0.84 | 0.54 |
| sce00563 | Glycosylphosphatidylinositol(GPI)-anchor biosynthesis | <i>S. mikatae</i>    | <i>S. kudriavzevii</i> | 0.85 | 0.60 |
| sce00340 | Histidine metabolism                                  | <i>S. cerevisiae</i> | <i>S. kudriavzevii</i> | 0.82 | 0.64 |
| sce00300 | Lysine biosynthesis                                   | <i>S. cerevisiae</i> | <i>S. paradoxus</i>    | 0.79 | 0.70 |
| sce04130 | SNARE interactions in vesicular transport             | <i>S. cerevisiae</i> | <i>S. mikatae</i>      | 0.79 | 0.80 |
| sce00450 | Selenocompound metabolism                             | <i>S. paradoxus</i>  | <i>S. kudriavzevii</i> | 0.80 | 0.63 |
| sce00061 | Fatty acid biosynthesis                               | <i>S. paradoxus</i>  | <i>S. kudriavzevii</i> | 0.77 | 0.83 |
| sce00909 | Sesquiterpenoid biosynthesis                          | <i>S. paradoxus</i>  | <i>S. mikatae</i>      | 0.73 | 0.56 |
| sce00100 | Steroid biosynthesis                                  | <i>S. paradoxus</i>  | <i>S. mikatae</i>      | 0.70 | 0.80 |
| sce00061 | Fatty acid biosynthesis                               | <i>S. cerevisiae</i> | <i>S. paradoxus</i>    | 0.70 | 0.63 |
| sce00071 | Fatty acid metabolism                                 | <i>S. cerevisiae</i> | <i>S. kudriavzevii</i> | 0.68 | 0.82 |
| sce00330 | Arginine and proline metabolism                       | <i>S. cerevisiae</i> | <i>S. paradoxus</i>    | 0.68 | 0.50 |
| sce00760 | Nicotinate and nicotinamide metabolism                | <i>S. paradoxus</i>  | <i>S. kudriavzevii</i> | 0.65 | 0.67 |
| sce04070 | Phosphatidylinositol signaling system                 | <i>S. cerevisiae</i> | <i>S. mikatae</i>      | 0.60 | 0.60 |
| sce00290 | Valine, leucine and isoleucine biosynthesis           | <i>S. cerevisiae</i> | <i>S. mikatae</i>      | 0.59 | 0.60 |
| sce00280 | Valine, leucine and isoleucine degradation            | <i>S. mikatae</i>    | <i>S. kudriavzevii</i> | 0.56 | 0.78 |
| sce03018 | RNA degradation                                       | <i>S. paradoxus</i>  | <i>S. kudriavzevii</i> | 0.57 | 0.67 |

|          |                                             |                      |                        |       |      |
|----------|---------------------------------------------|----------------------|------------------------|-------|------|
| sce00410 | beta-Alanine metabolism                     | <i>S. cerevisiae</i> | <i>S. mikatae</i>      | 0.58  | 0.59 |
| sce00340 | Histidine metabolism                        | <i>S. mikatae</i>    | <i>S. kudriavzevii</i> | 0.52  | 0.70 |
| sce00061 | Fatty acid biosynthesis                     | <i>S. paradoxus</i>  | <i>S. mikatae</i>      | 0.49  | 0.67 |
| sce00040 | Pentose and glucuronate interconversions    | <i>S. paradoxus</i>  | <i>S. mikatae</i>      | 0.46  | 0.56 |
| sce00100 | Steroid biosynthesis                        | <i>S. mikatae</i>    | <i>S. kudriavzevii</i> | 0.44  | 0.68 |
| sce00900 | Terpenoid backbone biosynthesis             | <i>S. paradoxus</i>  | <i>S. kudriavzevii</i> | 0.45  | 0.55 |
| sce04070 | Phosphatidylinositol signaling system       | <i>S. paradoxus</i>  | <i>S. mikatae</i>      | 0.38  | 1.00 |
| sce03018 | RNA degradation                             | <i>S. cerevisiae</i> | <i>S. mikatae</i>      | 0.36  | 0.58 |
| sce00780 | Biotin metabolism                           | <i>S. mikatae</i>    | <i>S. kudriavzevii</i> | 0.33  | 0.50 |
| sce00040 | Pentose and glucuronate interconversions    | <i>S. cerevisiae</i> | <i>S. mikatae</i>      | 0.33  | 0.53 |
| sce00780 | Biotin metabolism                           | <i>S. paradoxus</i>  | <i>S. kudriavzevii</i> | 0.30  | 0.62 |
| sce00910 | Nitrogen metabolism                         | <i>S. paradoxus</i>  | <i>S. mikatae</i>      | 0.29  | 0.57 |
| sce00565 | Ether lipid metabolism                      | <i>S. paradoxus</i>  | <i>S. kudriavzevii</i> | 0.26  | 0.59 |
| sce00561 | Glycerolipid metabolism                     | <i>S. mikatae</i>    | <i>S. kudriavzevii</i> | 0.26  | 1.00 |
| sce00280 | Valine, leucine and isoleucine degradation  | <i>S. paradoxus</i>  | <i>S. kudriavzevii</i> | 0.22  | 0.72 |
| sce00561 | Glycerolipid metabolism                     | <i>S. paradoxus</i>  | <i>S. mikatae</i>      | 0.23  | 0.59 |
| sce04141 | Protein processing in endoplasmic reticulum | <i>S. cerevisiae</i> | <i>S. mikatae</i>      | 0.20  | 0.57 |
| sce00051 | Fructose and mannose metabolism             | <i>S. cerevisiae</i> | <i>S. paradoxus</i>    | 0.20  | 0.67 |
| sce04145 | Phagosome                                   | <i>S. cerevisiae</i> | <i>S. kudriavzevii</i> | 0.10  | 0.56 |
| sce00650 | Butanoate metabolism                        | <i>S. cerevisiae</i> | <i>S. mikatae</i>      | 0.12  | 0.67 |
| sce00061 | Fatty acid biosynthesis                     | <i>S. mikatae</i>    | <i>S. kudriavzevii</i> | 0.11  | 0.57 |
| sce00290 | Valine, leucine and isoleucine biosynthesis | <i>S. paradoxus</i>  | <i>S. mikatae</i>      | 0.12  | 0.67 |
| sce00450 | Selenocompound metabolism                   | <i>S. mikatae</i>    | <i>S. kudriavzevii</i> | 0.08  | 0.68 |
| sce00480 | Glutathione metabolism                      | <i>S. cerevisiae</i> | <i>S. kudriavzevii</i> | 0.08  | 0.56 |
| sce00062 | Fatty acid elongation in mitochondria       | <i>S. cerevisiae</i> | <i>S. kudriavzevii</i> | 0.03  | 0.57 |
| sce00565 | Ether lipid metabolism                      | <i>S. cerevisiae</i> | <i>S. kudriavzevii</i> | -0.03 | 0.62 |
| sce00970 | Aminoacyl-tRNA biosynthesis                 | <i>S. mikatae</i>    | <i>S. kudriavzevii</i> | -0.02 | 0.57 |
| sce00750 | Vitamin B6 metabolism                       | <i>S. mikatae</i>    | <i>S. kudriavzevii</i> | -0.02 | 0.53 |
| sce00730 | Thiamine metabolism                         | <i>S. paradoxus</i>  | <i>S. kudriavzevii</i> | -0.07 | 0.63 |
| sce00450 | Selenocompound metabolism                   | <i>S. cerevisiae</i> | <i>S. kudriavzevii</i> | -0.05 | 0.66 |
| sce00500 | Starch and sucrose metabolism               | <i>S. cerevisiae</i> | <i>S. paradoxus</i>    | -0.04 | 0.67 |
| sce04070 | Phosphatidylinositol signaling system       | <i>S. paradoxus</i>  | <i>S. kudriavzevii</i> | -0.06 | 0.50 |
| sce03015 | mRNA surveillance pathway                   | <i>S. cerevisiae</i> | <i>S. kudriavzevii</i> | -0.06 | 0.78 |
| sce00860 | Porphyrin and chlorophyll metabolism        | <i>S. cerevisiae</i> | <i>S. kudriavzevii</i> | -0.10 | 0.65 |
| sce00062 | Fatty acid elongation in mitochondria       | <i>S. cerevisiae</i> | <i>S. mikatae</i>      | -0.11 | 0.70 |
| sce00071 | Fatty acid metabolism                       | <i>S. mikatae</i>    | <i>S. kudriavzevii</i> | -0.15 | 0.63 |
| sce00300 | Lysine biosynthesis                         | <i>S. cerevisiae</i> | <i>S. kudriavzevii</i> | -0.16 | 0.68 |
| sce00380 | Tryptophan metabolism                       | <i>S. mikatae</i>    | <i>S. kudriavzevii</i> | -0.15 | 0.67 |
| sce00860 | Porphyrin and chlorophyll metabolism        | <i>S. cerevisiae</i> | <i>S. paradoxus</i>    | -0.16 | 0.57 |
| sce00630 | Glyoxylate and dicarboxylate metabolism     | <i>S. cerevisiae</i> | <i>S. paradoxus</i>    | -0.16 | 0.65 |
| sce00040 | Pentose and glucuronate interconversions    | <i>S. paradoxus</i>  | <i>S. kudriavzevii</i> | -0.22 | 0.62 |
| sce00510 | N-Glycan biosynthesis                       | <i>S. mikatae</i>    | <i>S. kudriavzevii</i> | -0.27 | 0.57 |
| sce00510 | N-Glycan biosynthesis                       | <i>S. cerevisiae</i> | <i>S. kudriavzevii</i> | -0.28 | 0.74 |
| sce00410 | beta-Alanine metabolism                     | <i>S. cerevisiae</i> | <i>S. paradoxus</i>    | -0.29 | 0.67 |
| sce00670 | One carbon pool by folate                   | <i>S. paradoxus</i>  | <i>S. mikatae</i>      | -0.29 | 0.63 |
| sce00340 | Histidine metabolism                        | <i>S. cerevisiae</i> | <i>S. mikatae</i>      | -0.31 | 0.61 |
| sce00100 | Steroid biosynthesis                        | <i>S. cerevisiae</i> | <i>S. mikatae</i>      | -0.34 | 0.59 |
| sce00680 | Methane metabolism                          | <i>S. paradoxus</i>  | <i>S. kudriavzevii</i> | -0.32 | 0.59 |
| sce03015 | mRNA surveillance pathway                   | <i>S. mikatae</i>    | <i>S. kudriavzevii</i> | -0.35 | 0.54 |
| sce00300 | Lysine biosynthesis                         | <i>S. paradoxus</i>  | <i>S. kudriavzevii</i> | -0.37 | 1.00 |
| sce00520 | Amino sugar and nucleotide sugar metabolism | <i>S. paradoxus</i>  | <i>S. kudriavzevii</i> | -0.36 | 0.63 |
| sce00062 | Fatty acid elongation in mitochondria       | <i>S. mikatae</i>    | <i>S. kudriavzevii</i> | -0.39 | 0.59 |
| sce04141 | Protein processing in endoplasmic reticulum | <i>S. paradoxus</i>  | <i>S. mikatae</i>      | -0.40 | 0.67 |
| sce00510 | N-Glycan biosynthesis                       | <i>S. cerevisiae</i> | <i>S. mikatae</i>      | -0.42 | 0.60 |
| sce00780 | Biotin metabolism                           | <i>S. cerevisiae</i> | <i>S. kudriavzevii</i> | -0.46 | 0.67 |

|          |                                                       |                      |                        |       |      |
|----------|-------------------------------------------------------|----------------------|------------------------|-------|------|
| sce00500 | Starch and sucrose metabolism                         | <i>S. paradoxus</i>  | <i>S. mikatae</i>      | -0.46 | 1.00 |
| sce00250 | Alanine, aspartate and glutamate metabolism           | <i>S. paradoxus</i>  | <i>S. kudriavzevii</i> | -0.51 | 0.33 |
| sce00380 | Tryptophan metabolism                                 | <i>S. cerevisiae</i> | <i>S. kudriavzevii</i> | -0.52 | 0.67 |
| sce00630 | Glyoxylate and dicarboxylate metabolism               | <i>S. paradoxus</i>  | <i>S. mikatae</i>      | -0.55 | 1.00 |
| sce00562 | Inositol phosphate metabolism                         | <i>S. cerevisiae</i> | <i>S. paradoxus</i>    | -0.56 | 0.80 |
| sce00970 | Aminoacyl-tRNA biosynthesis                           | <i>S. cerevisiae</i> | <i>S. kudriavzevii</i> | -0.57 | 0.61 |
| sce00900 | Terpenoid backbone biosynthesis                       | <i>S. paradoxus</i>  | <i>S. mikatae</i>      | -0.57 | 0.75 |
| sce00730 | Thiamine metabolism                                   | <i>S. mikatae</i>    | <i>S. kudriavzevii</i> | -0.59 | 1.00 |
| sce00910 | Nitrogen metabolism                                   | <i>S. cerevisiae</i> | <i>S. paradoxus</i>    | -0.60 | 0.40 |
| sce00790 | Folate biosynthesis                                   | <i>S. paradoxus</i>  | <i>S. kudriavzevii</i> | -0.64 | 0.53 |
| sce04130 | SNARE interactions in vesicular transport             | <i>S. cerevisiae</i> | <i>S. kudriavzevii</i> | -0.64 | 1.00 |
| sce00480 | Glutathione metabolism                                | <i>S. cerevisiae</i> | <i>S. mikatae</i>      | -0.66 | 0.63 |
| sce00071 | Fatty acid metabolism                                 | <i>S. cerevisiae</i> | <i>S. mikatae</i>      | -0.68 | 0.83 |
| sce00565 | Ether lipid metabolism                                | <i>S. mikatae</i>    | <i>S. kudriavzevii</i> | -0.56 | 0.69 |
| sce00900 | Terpenoid backbone biosynthesis                       | <i>S. mikatae</i>    | <i>S. kudriavzevii</i> | -0.72 | 0.80 |
| sce00680 | Methane metabolism                                    | <i>S. mikatae</i>    | <i>S. kudriavzevii</i> | -0.78 | 1.00 |
| sce00100 | Steroid biosynthesis                                  | <i>S. cerevisiae</i> | <i>S. paradoxus</i>    | -0.79 | 0.57 |
| sce00400 | Phenylalanine, tyrosine and tryptophan biosynthesis   | <i>S. cerevisiae</i> | <i>S. mikatae</i>      | -0.80 | 1.00 |
| sce00300 | Lysine biosynthesis                                   | <i>S. mikatae</i>    | <i>S. kudriavzevii</i> | -0.75 | 0.50 |
| sce03018 | RNA degradation                                       | <i>S. mikatae</i>    | <i>S. kudriavzevii</i> | -0.81 | 0.62 |
| sce00300 | Lysine biosynthesis                                   | <i>S. cerevisiae</i> | <i>S. mikatae</i>      | -0.81 | 0.71 |
| sce03018 | RNA degradation                                       | <i>S. cerevisiae</i> | <i>S. kudriavzevii</i> | -0.85 | 1.00 |
| sce00920 | Sulfur metabolism                                     | <i>S. paradoxus</i>  | <i>S. kudriavzevii</i> | -0.88 | 0.67 |
| sce03013 | RNA transport                                         | <i>S. paradoxus</i>  | <i>S. kudriavzevii</i> | -0.89 | 0.87 |
| sce00730 | Thiamine metabolism                                   | <i>S. cerevisiae</i> | <i>S. kudriavzevii</i> | -0.90 | 0.50 |
| sce00410 | beta-Alanine metabolism                               | <i>S. paradoxus</i>  | <i>S. kudriavzevii</i> | -0.93 | 0.78 |
| sce00740 | Riboflavin metabolism                                 | <i>S. paradoxus</i>  | <i>S. kudriavzevii</i> | -0.94 | 0.67 |
| sce00900 | Terpenoid backbone biosynthesis                       | <i>S. cerevisiae</i> | <i>S. mikatae</i>      | -0.95 | 0.60 |
| sce00100 | Steroid biosynthesis                                  | <i>S. paradoxus</i>  | <i>S. kudriavzevii</i> | -0.93 | 0.67 |
| sce00620 | Pyruvate metabolism                                   | <i>S. cerevisiae</i> | <i>S. kudriavzevii</i> | -0.97 | 0.56 |
| sce00380 | Tryptophan metabolism                                 | <i>S. cerevisiae</i> | <i>S. mikatae</i>      | -0.97 | 0.78 |
| sce00562 | Inositol phosphate metabolism                         | <i>S. cerevisiae</i> | <i>S. mikatae</i>      | -0.97 | 0.69 |
| sce04070 | Phosphatidylinositol signaling system                 | <i>S. mikatae</i>    | <i>S. kudriavzevii</i> | -1.01 | 0.74 |
| sce04122 | Sulfur relay system                                   | <i>S. mikatae</i>    | <i>S. kudriavzevii</i> | -0.95 | 0.50 |
| sce00520 | Amino sugar and nucleotide sugar metabolism           | <i>S. cerevisiae</i> | <i>S. kudriavzevii</i> | -1.07 | 1.00 |
| sce00600 | Sphingolipid metabolism                               | <i>S. paradoxus</i>  | <i>S. kudriavzevii</i> | -1.07 | 0.64 |
| sce00900 | Terpenoid backbone biosynthesis                       | <i>S. cerevisiae</i> | <i>S. paradoxus</i>    | -1.08 | 0.77 |
| sce00563 | Glycosylphosphatidylinositol(GPI)-anchor biosynthesis | <i>S. cerevisiae</i> | <i>S. kudriavzevii</i> | -1.13 | 0.56 |
| sce00380 | Tryptophan metabolism                                 | <i>S. cerevisiae</i> | <i>S. paradoxus</i>    | -1.14 | 0.64 |
| sce00650 | Butanoate metabolism                                  | <i>S. paradoxus</i>  | <i>S. mikatae</i>      | -1.11 | 0.63 |
| sce00340 | Histidine metabolism                                  | <i>S. paradoxus</i>  | <i>S. mikatae</i>      | -1.16 | 0.92 |
| sce00670 | One carbon pool by folate                             | <i>S. mikatae</i>    | <i>S. kudriavzevii</i> | -1.21 | 0.83 |
| sce00770 | Pantothenate and CoA biosynthesis                     | <i>S. mikatae</i>    | <i>S. kudriavzevii</i> | -1.23 | 1.00 |
| sce00600 | Sphingolipid metabolism                               | <i>S. cerevisiae</i> | <i>S. mikatae</i>      | -1.23 | 0.67 |
| sce00410 | beta-Alanine metabolism                               | <i>S. mikatae</i>    | <i>S. kudriavzevii</i> | -1.28 | 0.44 |
| sce00900 | Terpenoid backbone biosynthesis                       | <i>S. cerevisiae</i> | <i>S. kudriavzevii</i> | -1.34 | 0.61 |
| sce00970 | Aminoacyl-tRNA biosynthesis                           | <i>S. cerevisiae</i> | <i>S. mikatae</i>      | -1.31 | 0.74 |
| sce00260 | Glycine, serine and threonine metabolism              | <i>S. paradoxus</i>  | <i>S. mikatae</i>      | -1.35 | 0.61 |
| sce03013 | RNA transport                                         | <i>S. cerevisiae</i> | <i>S. paradoxus</i>    | -1.37 | 0.50 |
| sce00510 | N-Glycan biosynthesis                                 | <i>S. paradoxus</i>  | <i>S. mikatae</i>      | -1.34 | 0.79 |
| sce03015 | mRNA surveillance pathway                             | <i>S. paradoxus</i>  | <i>S. mikatae</i>      | -1.36 | 0.68 |
| sce00600 | Sphingolipid metabolism                               | <i>S. mikatae</i>    | <i>S. kudriavzevii</i> | -1.37 | 0.69 |
| sce00400 | Phenylalanine, tyrosine and tryptophan biosynthesis   | <i>S. paradoxus</i>  | <i>S. kudriavzevii</i> | -1.46 | 0.77 |
| sce00040 | Pentose and glucuronate interconversions              | <i>S. cerevisiae</i> | <i>S. kudriavzevii</i> | -1.33 | 0.65 |

|          |                                                       |               |                 |       |      |
|----------|-------------------------------------------------------|---------------|-----------------|-------|------|
| sce00100 | Steroid biosynthesis                                  | S. cerevisiae | S. kudriavzevii | -1.43 | 0.76 |
| sce00740 | Riboflavin metabolism                                 | S. paradoxus  | S. mikatae      | -1.53 | 0.70 |
| sce00040 | Pentose and glucuronate interconversions              | S. mikatae    | S. kudriavzevii | -1.37 | 0.67 |
| sce00600 | Sphingolipid metabolism                               | S. cerevisiae | S. kudriavzevii | -1.54 | 0.71 |
| sce00563 | Glycosylphosphatidylinositol(GPI)-anchor biosynthesis | S. cerevisiae | S. paradoxus    | -1.55 | 0.52 |
| sce00250 | Alanine, aspartate and glutamate metabolism           | S. mikatae    | S. kudriavzevii | -1.64 | 0.33 |
| sce04141 | Protein processing in endoplasmic reticulum           | S. mikatae    | S. kudriavzevii | -1.58 | 0.64 |
| sce00330 | Arginine and proline metabolism                       | S. cerevisiae | S. mikatae      | -1.65 | 0.55 |
| sce04011 | MAPK signaling pathway - yeast                        | S. paradoxus  | S. mikatae      | -1.66 | 0.61 |
| sce04070 | Phosphatidylinositol signaling system                 | S. cerevisiae | S. kudriavzevii | -1.66 | 0.67 |
| sce00564 | Glycerophospholipid metabolism                        | S. mikatae    | S. kudriavzevii | -1.66 | 0.61 |
| sce00250 | Alanine, aspartate and glutamate metabolism           | S. cerevisiae | S. kudriavzevii | -1.75 | 0.60 |
| sce00730 | Thiamine metabolism                                   | S. paradoxus  | S. mikatae      | -1.68 | 0.90 |
| sce00052 | Galactose metabolism                                  | S. cerevisiae | S. paradoxus    | -1.76 | 0.50 |
| sce00410 | beta-Alanine metabolism                               | S. cerevisiae | S. kudriavzevii | -1.83 | 0.61 |
| sce04011 | MAPK signaling pathway - yeast                        | S. cerevisiae | S. paradoxus    | -1.88 | 0.56 |
| sce03015 | mRNA surveillance pathway                             | S. cerevisiae | S. mikatae      | -1.87 | 0.70 |
| sce00562 | Inositol phosphate metabolism                         | S. paradoxus  | S. mikatae      | -1.88 | 0.75 |
| sce00030 | Pentose phosphate pathway                             | S. paradoxus  | S. kudriavzevii | -2.08 | 0.58 |
| sce00760 | Nicotinate and nicotinamide metabolism                | S. paradoxus  | S. mikatae      | -2.07 | 0.60 |
| sce00563 | Glycosylphosphatidylinositol(GPI)-anchor biosynthesis | S. cerevisiae | S. mikatae      | -2.03 | 0.55 |
| sce00051 | Fructose and mannose metabolism                       | S. cerevisiae | S. kudriavzevii | -2.24 | 0.57 |
| sce04141 | Protein processing in endoplasmic reticulum           | S. cerevisiae | S. kudriavzevii | -2.17 | 0.71 |
| sce00563 | Glycosylphosphatidylinositol(GPI)-anchor biosynthesis | S. paradoxus  | S. mikatae      | -2.22 | 0.57 |
| sce00380 | Tryptophan metabolism                                 | S. paradoxus  | S. mikatae      | -2.21 | 0.57 |
| sce00330 | Arginine and proline metabolism                       | S. paradoxus  | S. kudriavzevii | -2.35 | 0.60 |
| sce04011 | MAPK signaling pathway - yeast                        | S. cerevisiae | S. mikatae      | -2.34 | 0.70 |
| sce00790 | Folate biosynthesis                                   | S. mikatae    | S. kudriavzevii | -2.26 | 0.57 |
| sce00770 | Pantothenate and CoA biosynthesis                     | S. cerevisiae | S. mikatae      | -2.39 | 0.63 |
| sce00480 | Glutathione metabolism                                | S. cerevisiae | S. paradoxus    | -2.34 | 0.63 |
| sce00330 | Arginine and proline metabolism                       | S. paradoxus  | S. mikatae      | -2.42 | 0.60 |
| sce00400 | Phenylalanine, tyrosine and tryptophan biosynthesis   | S. cerevisiae | S. kudriavzevii | -2.41 | 0.74 |
| sce00600 | Sphingolipid metabolism                               | S. paradoxus  | S. mikatae      | -2.33 | 0.58 |
| sce00030 | Pentose phosphate pathway                             | S. cerevisiae | S. paradoxus    | -2.55 | 0.60 |
| sce00564 | Glycerophospholipid metabolism                        | S. paradoxus  | S. mikatae      | -2.44 | 0.64 |
| sce00052 | Galactose metabolism                                  | S. paradoxus  | S. mikatae      | -2.52 | 0.50 |
| sce00520 | Amino sugar and nucleotide sugar metabolism           | S. cerevisiae | S. mikatae      | -2.53 | 0.63 |
| sce00330 | Arginine and proline metabolism                       | S. mikatae    | S. kudriavzevii | -2.58 | 0.63 |
| sce00051 | Fructose and mannose metabolism                       | S. cerevisiae | S. mikatae      | -2.62 | 0.63 |
| sce00564 | Glycerophospholipid metabolism                        | S. cerevisiae | S. kudriavzevii | -2.56 | 0.75 |
| sce00740 | Riboflavin metabolism                                 | S. cerevisiae | S. kudriavzevii | -2.69 | 0.67 |
| sce00480 | Glutathione metabolism                                | S. paradoxus  | S. kudriavzevii | -2.68 | 0.60 |
| sce00520 | Amino sugar and nucleotide sugar metabolism           | S. mikatae    | S. kudriavzevii | -2.77 | 1.00 |
| sce00270 | Cysteine and methionine metabolism                    | S. paradoxus  | S. kudriavzevii | -2.93 | 0.63 |
| sce00860 | Porphyrin and chlorophyll metabolism                  | S. paradoxus  | S. mikatae      | -2.69 | 0.50 |
| sce00770 | Pantothenate and CoA biosynthesis                     | S. cerevisiae | S. paradoxus    | -2.81 | 0.64 |
| sce00400 | Phenylalanine, tyrosine and tryptophan biosynthesis   | S. mikatae    | S. kudriavzevii | -2.84 | 1.00 |
| sce00564 | Glycerophospholipid metabolism                        | S. cerevisiae | S. paradoxus    | -2.80 | 0.63 |

|          |                                                     |                      |                        |       |      |
|----------|-----------------------------------------------------|----------------------|------------------------|-------|------|
| sce00740 | Riboflavin metabolism                               | <i>S. mikatae</i>    | <i>S. kudriavzevii</i> | -2.79 | 0.53 |
| sce00480 | Glutathione metabolism                              | <i>S. paradoxus</i>  | <i>S. mikatae</i>      | -2.82 | 0.67 |
| sce00500 | Starch and sucrose metabolism                       | <i>S. cerevisiae</i> | <i>S. mikatae</i>      | -3.16 | 0.58 |
| sce00770 | Pantothenate and CoA biosynthesis                   | <i>S. paradoxus</i>  | <i>S. kudriavzevii</i> | -2.98 | 0.58 |
| sce00760 | Nicotinate and nicotinamide metabolism              | <i>S. cerevisiae</i> | <i>S. mikatae</i>      | -3.19 | 0.67 |
| sce00400 | Phenylalanine, tyrosine and tryptophan biosynthesis | <i>S. paradoxus</i>  | <i>S. mikatae</i>      | -3.07 | 0.50 |
| sce00010 | Glycolysis / Gluconeogenesis                        | <i>S. paradoxus</i>  | <i>S. kudriavzevii</i> | -3.37 | 0.57 |
| sce00740 | Riboflavin metabolism                               | <i>S. cerevisiae</i> | <i>S. paradoxus</i>    | -3.22 | 0.80 |
| sce04011 | MAPK signaling pathway - yeast                      | <i>S. paradoxus</i>  | <i>S. kudriavzevii</i> | -3.31 | 0.63 |
| sce00670 | One carbon pool by folate                           | <i>S. cerevisiae</i> | <i>S. mikatae</i>      | -3.29 | 0.54 |
| sce00250 | Alanine, aspartate and glutamate metabolism         | <i>S. paradoxus</i>  | <i>S. mikatae</i>      | -3.47 | 0.67 |
| sce00520 | Amino sugar and nucleotide sugar metabolism         | <i>S. paradoxus</i>  | <i>S. mikatae</i>      | -3.44 | 0.52 |
| sce00480 | Glutathione metabolism                              | <i>S. mikatae</i>    | <i>S. kudriavzevii</i> | -3.34 | 0.67 |
| sce00860 | Porphyrin and chlorophyll metabolism                | <i>S. mikatae</i>    | <i>S. kudriavzevii</i> | -3.25 | 0.58 |
| sce03013 | RNA transport                                       | <i>S. cerevisiae</i> | <i>S. kudriavzevii</i> | -3.63 | 0.67 |
| sce00250 | Alanine, aspartate and glutamate metabolism         | <i>S. cerevisiae</i> | <i>S. paradoxus</i>    | -3.72 | 0.70 |
| sce00030 | Pentose phosphate pathway                           | <i>S. cerevisiae</i> | <i>S. mikatae</i>      | -3.93 | 0.58 |
| sce00330 | Arginine and proline metabolism                     | <i>S. cerevisiae</i> | <i>S. kudriavzevii</i> | -3.73 | 0.73 |
| sce00670 | One carbon pool by folate                           | <i>S. cerevisiae</i> | <i>S. kudriavzevii</i> | -3.55 | 0.60 |
| sce00670 | One carbon pool by folate                           | <i>S. cerevisiae</i> | <i>S. paradoxus</i>    | -3.67 | 0.68 |
| sce00250 | Alanine, aspartate and glutamate metabolism         | <i>S. cerevisiae</i> | <i>S. mikatae</i>      | -3.86 | 0.59 |
| sce00051 | Fructose and mannose metabolism                     | <i>S. paradoxus</i>  | <i>S. mikatae</i>      | -3.80 | 0.67 |
| sce00860 | Porphyrin and chlorophyll metabolism                | <i>S. cerevisiae</i> | <i>S. mikatae</i>      | -3.49 | 0.66 |
| sce00620 | Pyruvate metabolism                                 | <i>S. cerevisiae</i> | <i>S. paradoxus</i>    | -3.93 | 0.62 |
| sce00920 | Sulfur metabolism                                   | <i>S. paradoxus</i>  | <i>S. mikatae</i>      | -3.40 | 0.65 |
| sce00760 | Nicotinate and nicotinamide metabolism              | <i>S. mikatae</i>    | <i>S. kudriavzevii</i> | -3.97 | 0.50 |
| sce00680 | Methane metabolism                                  | <i>S. cerevisiae</i> | <i>S. paradoxus</i>    | -3.97 | 0.57 |
| sce04011 | MAPK signaling pathway - yeast                      | <i>S. mikatae</i>    | <i>S. kudriavzevii</i> | -3.96 | 0.67 |
| sce00760 | Nicotinate and nicotinamide metabolism              | <i>S. cerevisiae</i> | <i>S. kudriavzevii</i> | -4.22 | 0.60 |
| sce00052 | Galactose metabolism                                | <i>S. paradoxus</i>  | <i>S. kudriavzevii</i> | -4.09 | 0.63 |
| sce00030 | Pentose phosphate pathway                           | <i>S. mikatae</i>    | <i>S. kudriavzevii</i> | -4.52 | 0.55 |
| sce00030 | Pentose phosphate pathway                           | <i>S. paradoxus</i>  | <i>S. mikatae</i>      | -4.46 | 0.58 |
| sce00260 | Glycine, serine and threonine metabolism            | <i>S. paradoxus</i>  | <i>S. kudriavzevii</i> | -4.13 | 0.55 |
| sce00030 | Pentose phosphate pathway                           | <i>S. cerevisiae</i> | <i>S. kudriavzevii</i> | -4.65 | 0.55 |
| sce03008 | Ribosome biogenesis in eukaryotes                   | <i>S. cerevisiae</i> | <i>S. paradoxus</i>    | -4.34 | 0.75 |
| sce03008 | Ribosome biogenesis in eukaryotes                   | <i>S. paradoxus</i>  | <i>S. mikatae</i>      | -4.31 | 0.54 |
| sce03008 | Ribosome biogenesis in eukaryotes                   | <i>S. cerevisiae</i> | <i>S. kudriavzevii</i> | -4.43 | 0.50 |
| sce00740 | Riboflavin metabolism                               | <i>S. cerevisiae</i> | <i>S. mikatae</i>      | -4.33 | 0.61 |
| sce04011 | MAPK signaling pathway - yeast                      | <i>S. cerevisiae</i> | <i>S. kudriavzevii</i> | -4.40 | 0.62 |
| sce00020 | Citrate cycle (TCA cycle)                           | <i>S. cerevisiae</i> | <i>S. paradoxus</i>    | -4.87 | 0.54 |
| sce03008 | Ribosome biogenesis in eukaryotes                   | <i>S. paradoxus</i>  | <i>S. kudriavzevii</i> | -4.62 | 0.63 |
| sce00680 | Methane metabolism                                  | <i>S. cerevisiae</i> | <i>S. kudriavzevii</i> | -4.50 | 0.57 |
| sce00052 | Galactose metabolism                                | <i>S. cerevisiae</i> | <i>S. mikatae</i>      | -4.56 | 0.60 |
| sce00770 | Pantothenate and CoA biosynthesis                   | <i>S. cerevisiae</i> | <i>S. kudriavzevii</i> | -4.67 | 0.56 |
| sce00010 | Glycolysis / Gluconeogenesis                        | <i>S. paradoxus</i>  | <i>S. mikatae</i>      | -5.30 | 0.75 |
| sce00052 | Galactose metabolism                                | <i>S. mikatae</i>    | <i>S. kudriavzevii</i> | -4.87 | 0.67 |
| sce00564 | Glycerophospholipid metabolism                      | <i>S. cerevisiae</i> | <i>S. mikatae</i>      | -4.34 | 0.67 |
| sce00010 | Glycolysis / Gluconeogenesis                        | <i>S. cerevisiae</i> | <i>S. paradoxus</i>    | -5.42 | 0.60 |
| sce00052 | Galactose metabolism                                | <i>S. cerevisiae</i> | <i>S. kudriavzevii</i> | -4.95 | 0.58 |
| sce00680 | Methane metabolism                                  | <i>S. cerevisiae</i> | <i>S. mikatae</i>      | -5.00 | 0.56 |
| sce00260 | Glycine, serine and threonine metabolism            | <i>S. mikatae</i>    | <i>S. kudriavzevii</i> | -4.94 | 0.53 |
| sce03008 | Ribosome biogenesis in eukaryotes                   | <i>S. cerevisiae</i> | <i>S. mikatae</i>      | -5.38 | 0.75 |
| sce00260 | Glycine, serine and threonine metabolism            | <i>S. cerevisiae</i> | <i>S. kudriavzevii</i> | -5.30 | 0.61 |
| sce03008 | Ribosome biogenesis in eukaryotes                   | <i>S. mikatae</i>    | <i>S. kudriavzevii</i> | -5.47 | 0.57 |

|          |                                    |                      |                        |        |      |
|----------|------------------------------------|----------------------|------------------------|--------|------|
| sce00270 | Cysteine and methionine metabolism | <i>S. cerevisiae</i> | <i>S. paradoxus</i>    | -6.21  | 0.72 |
| sce00020 | Citrate cycle (TCA cycle)          | <i>S. cerevisiae</i> | <i>S. mikatae</i>      | -6.28  | 0.56 |
| sce00020 | Citrate cycle (TCA cycle)          | <i>S. paradoxus</i>  | <i>S. mikatae</i>      | -6.22  | 0.50 |
| sce00620 | Pyruvate metabolism                | <i>S. cerevisiae</i> | <i>S. mikatae</i>      | -5.87  | 0.80 |
| sce00020 | Citrate cycle (TCA cycle)          | <i>S. cerevisiae</i> | <i>S. kudriavzevii</i> | -6.78  | 0.54 |
| sce00270 | Cysteine and methionine metabolism | <i>S. cerevisiae</i> | <i>S. kudriavzevii</i> | -6.95  | 0.65 |
| sce00240 | Pyrimidine metabolism              | <i>S. cerevisiae</i> | <i>S. paradoxus</i>    | -7.30  | 1.00 |
| sce00010 | Glycolysis / Gluconeogenesis       | <i>S. cerevisiae</i> | <i>S. mikatae</i>      | -9.48  | 0.59 |
| sce00010 | Glycolysis / Gluconeogenesis       | <i>S. cerevisiae</i> | <i>S. kudriavzevii</i> | -7.45  | 0.63 |
| sce00010 | Glycolysis / Gluconeogenesis       | <i>S. mikatae</i>    | <i>S. kudriavzevii</i> | -8.45  | 0.60 |
| sce00020 | Citrate cycle (TCA cycle)          | <i>S. paradoxus</i>  | <i>S. kudriavzevii</i> | -7.74  | 0.67 |
| sce00020 | Citrate cycle (TCA cycle)          | <i>S. mikatae</i>    | <i>S. kudriavzevii</i> | -8.82  | 0.57 |
| sce00240 | Pyrimidine metabolism              | <i>S. paradoxus</i>  | <i>S. mikatae</i>      | -7.98  | 0.55 |
| sce00240 | Pyrimidine metabolism              | <i>S. paradoxus</i>  | <i>S. kudriavzevii</i> | -9.81  | 0.56 |
| sce00270 | Cysteine and methionine metabolism | <i>S. cerevisiae</i> | <i>S. mikatae</i>      | -7.43  | 0.56 |
| sce00270 | Cysteine and methionine metabolism | <i>S. mikatae</i>    | <i>S. kudriavzevii</i> | -8.21  | 0.55 |
| sce04111 | Cell cycle - yeast                 | <i>S. cerevisiae</i> | <i>S. paradoxus</i>    | -10.63 | 0.55 |
| sce04111 | Cell cycle - yeast                 | <i>S. paradoxus</i>  | <i>S. mikatae</i>      | -9.04  | 0.60 |
| sce04111 | Cell cycle - yeast                 | <i>S. paradoxus</i>  | <i>S. kudriavzevii</i> | -11.59 | 0.62 |
| sce04113 | Meiosis - yeast                    | <i>S. cerevisiae</i> | <i>S. paradoxus</i>    | -10.30 | 0.62 |
| sce04113 | Meiosis - yeast                    | <i>S. paradoxus</i>  | <i>S. mikatae</i>      | -8.26  | 0.60 |
| sce04113 | Meiosis - yeast                    | <i>S. paradoxus</i>  | <i>S. kudriavzevii</i> | -10.65 | 0.58 |
| sce04144 | Endocytosis                        | <i>S. paradoxus</i>  | <i>S. mikatae</i>      | -1.00  | 0.64 |



### 3 Supplementary Text

#### 3.1 Dynamical system model reconstruction

We present a general method to reconstruct dynamical system models (DSMs) from observed data. The method will obtain  $\hat{f}_i$  with estimated parameters in the deterministic part  $f_i$  in the nonlinear additive ordinary differential equation (ODE) given in the main text. Let a sample of size  $n$  be taken at time  $t_1, \dots, t_n$ .

Given a mathematical form of  $f_i$  with unknown parameters, we obtain an estimate  $\hat{f}_i$  for variable  $i$  to minimize residuals by least squares. Then we measure its goodness-of-fit using the residual sum of squares ( $RSS$ ), by

$$RSS(i) = \sum_{k=1}^n [y_i(t_k) - \hat{f}_i(\mathbf{x}(t_k))]^2 \quad (S1)$$

We also define a null model  $\hat{f}_i^0$ , embedded in and simpler than  $f_i$ , by time average of  $y_i(t_k)$  as

$$\hat{f}_i^0 = \frac{1}{n} \sum_{k=1}^n y_i(t_k) \quad (S2)$$

Similarly, we compute the residual sum of squares  $RSS_0(i)$  for  $\hat{f}_i^0$ .  $RSS(i)$  is compared with  $RSS_0(i)$  to quantify the improvement by  $\hat{f}_i$  over  $\hat{f}_i^0$  using Fisher's  $F$ -test

$$F(i) = \frac{[RSS_0(i) - RSS(i)]/u}{RSS(i)/v} \quad (S3)$$

where  $u = m(i) - m_0(i)$  and  $v = n - m(i)$  are the degrees of freedom with  $m_0(i) = 1$  being the model complexity (number of parameters) of  $\hat{f}_i^0$  and  $m(i)$  the model complexity of  $\hat{f}_i$ . Under standard normality assumptions,  $F(i)$  follows an  $F$ -distribution with  $u$ -numerator and  $v$ -denominator degrees of freedom under the null hypothesis of  $\hat{f}_i^0$  being the true model.

To choose the mathematical form and optimize parameters of model  $\hat{f}_i$  for variable  $i$ , we enumerate the linear combination of the nonlinear terms and select one with the most significant improvement by minimizing the  $p$ -value computed for  $F(i)$

$$\hat{f}_i = \underset{f_i}{\operatorname{argmin}} \{p\text{-value of } F(i) \text{ with } f_i\} \quad (S4)$$

The above outlines a basic regression method to estimate  $f_i$ , and it is possible to use other strategies more pertinent to a data set. For example, in comparative dynamical system modeling, the  $F$ -statistic used is computed on multiple data sets under different conditions as described in the main text.

Our DSM, employing additive linear, quadratic, and sigmoidal ODEs, has biases towards such parametric forms. It may be, however, less critical to model comparison than model reconstruction. Despite using inexact ODE forms from most BioModels (Chelliah et al., 2013), DSM approximation demonstrated a considerable improvement over linear approximation used in GSCA in pathway comparison. Additionally, we assume availability of sufficiently sampled time course data to estimate derivatives accurately. Also, as we assume a same topology for both conditions, pathway rewiring is implicitly achieved by close-to-zero coefficients for some interactions in one condition but not the other. Finally, finding a sub-graph from a given pathway topology, adaptation of known interactions is facilitated, but not for novel interactions, which can be complemented by interaction-driven comparative dynamical system modeling (Ouyang et al., 2011).

#### 3.2 Comparable performance of GSCA and the $Q$ -method at various noise levels

We generated ground truth of conserved and differential models from original models in BioModels database (Chelliah et al., 2013). A conserved model is the same with an original model but with a changed initial state. This can have a dramatic effect on system dynamics. The initial value of a variable was changed by adding a random number uniformly distributed in  $[L, U]$  to the original initial state.  $L$  and  $U$  are determined by model sensitivity to the initial state. Too much change can break a relationship between variables due to numerical instability.

To create a differential model, parameter values in the original model are changed by a random number normally distributed with mean  $\mu$  and standard deviation  $\sigma$ . To avoid numerical instability,  $\mu$  and  $\sigma$  vary depending on model sensitivity to parameters.

To cover diverse initial states and parameters, we generated 100 conserved and 100 differential models for each original model. Given a model and its initial state, we simulated time courses and added noises at signal-to-noise ratios (SNRs) of 100, 20, 10, or 0 dB. The time courses are generated by solving ODEs in each model using R package `deSolve` Soetaert et al. (2010), and sampled at 100 time points, uniformly spaced with a model-dependent time increment between each pair of time points. The perturbation values for each model are described in main text Table 1, and the runtime of the simulation study on each model is given in main text Table 2.

Outstanding from most BioModels (Chelliah et al., 2013) on which we tested, the  $Q$ -method and GSCA performed comparably on a circadian oscillation model (BIOM0000000021) at a 100 dB signal-to-noise ratio (SNR) in Figure S5. The similar performance of the two methods can be explained by Figure S6, showing the phase planes of each pair

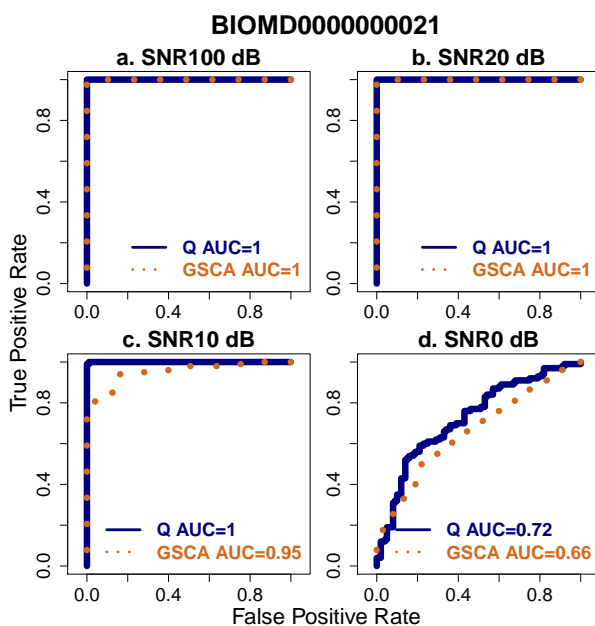

**Figure S5.** The ROC curves by the  $Q$ -method (blue lines) and GSCA (orange dots) for a circadian oscillation model (BioModels BIOM0000000021) at SNRs of 100, 20, 10, and 0 dB. GSCA performed worse than but comparably to the  $Q$ -method.

of nodes on the BIOM0000000021 pathway. In the figure, pairwise linear correlation in GSCA is consistently high between the apparently similar trajectories generated by the original and the conserved models, but very weak due to distinct differences between the trajectories of the original and the differential models. This situation is likely to arise when a conserved model starts at an initial state very similar to the original model – critical for GSCA to work effectively on non-chaotic nonlinear systems.

### 3.3 Predicting rewired pathways among four yeast species

To determine whether inherent genetic variations can be predicted by detected pathway heterogeneity using the  $Q$ -method, we applied the method to compare transcriptome time courses from four different yeast species: *S. cerevisiae*, *S. paradoxus*, *S. mikatae*, and *S. kudriavzevii*. We first obtained pathway heterogeneity for each of the 68 yeast pathways in KEGG between each pair of the four yeast species using their transcriptomes under various stress conditions (Tirosh et al., 2006). Using their respective reference genome sequences, we further calculated TATA box disparity between pathway pairs among the four yeast species. We finally report a strong association between pathway interaction heterogeneity and pathway TATA box disparity among the four species.

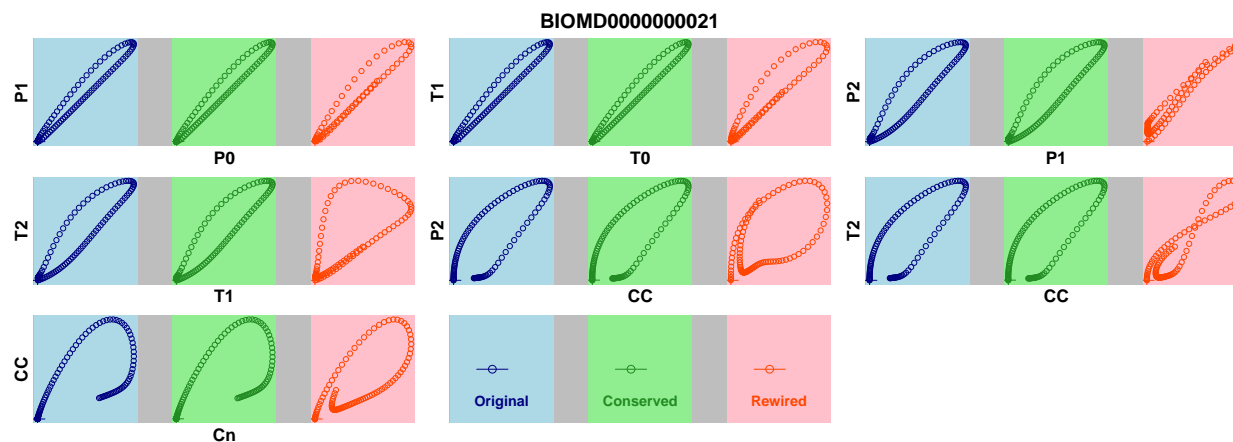

**Figure S6. Dynamic behavior conducive to both  $Q$ -method and GSCA on comparing a circadian oscillation model (BIOM000000021).** Phase planes in each grey box are the interactions between nodes on the pathway in the original (blue), conserved (green), and rewired/differential (red) models. The original and conserved phase planes show very little change, but the original and differential differ substantially among the pairs of P1-P2, T1-T2, P2-CC, and T2-CC.

### 3.3.1 TATA box detection

The reference genomes of the four yeast species were published by Engel et al. (2014) for *S. cerevisiae*, by Kellis et al. (2003) for *S. paradoxus* and *S. mikatae*, and by Cliften et al. (2003) for *S. kudriavzevii*. The open reading frames (ORFs) and all reference yeast genomes were downloaded from *Saccharomyces* Genome Database ([www.yeastgenome.org](http://www.yeastgenome.org)). We first annotated each genome other than the already annotated *S. cerevisiae*. For each ORF in *S. cerevisiae*, we find its match within each of the three other genomes using BLAST (Altschul et al., 1990). For each identified occurrence of an ORF, the 300bp sequence region upstream of the ORF's start codon was extracted. Then we searched for TATA boxes in these upstream regions using the consensus sequence motif TATA(A/T)A(A/T)(A/G) reported for yeast by (Basehoar et al., 2004). The number and percentage of TATA-containing genes are summarized in Table S5. Our result shows that TATA box presence in a genome is weakly conserved among the yeast species.

**Table S3. Statistics on TATA-containing genes in four yeast species.** For each species, the total number of gene in its genome, and the number and percentage of TATA box-containing genes are given.

| Species                           | Number of ORFs | TATA-containing | Percentage |
|-----------------------------------|----------------|-----------------|------------|
| <i>Saccharomyces cerevisiae</i>   | 5044           | 860             | 17.05%     |
| <i>Saccharomyces paradoxus</i>    | 4942           | 909             | 18.39%     |
| <i>Saccharomyces mikatae</i>      | 3954           | 650             | 16.44%     |
| <i>Saccharomyces kudriavzevii</i> | 3400           | 399             | 11.74%     |

The number of genes containing a TATA box in their promoters is found to be a little less than 20% in three of the four studied yeast species. *S. paradoxus* has the most abundance of TATA box-containing genes. However, *S. kudriavzevii* has the least percentage of TATA-containing genes.

### 3.3.2 Pathway TATA box disparity

We define pathway TATA box disparity between two species as the ratio of the number of genes in that pathway with TATA box present in only one species to the number of genes with a TATA box in either one of the two species. That

is

$$\begin{aligned} & \text{Pathway TATA box disparity} \\ &= \frac{\text{Number of genes TATA-containing in one species but TATA-less in the other within the pathway}}{\text{Number of TATA-containing genes in either species within the pathway}} \quad (\text{S5}) \end{aligned}$$

Table S6 illustrates how to compute pathway TATA box disparity. The pathway TATA box disparity column in Table S4

**Table S4. An example to compute pathway TATA box disparity.** We assume a pathway contains five genes. For the two species under comparison, the absence/presence of a TATA box on each gene is given in the table.

| Pathway genes | TATA box in species 1 | TATA box in species 2 |
|---------------|-----------------------|-----------------------|
| Gene 1        | absent                | absent                |
| Gene 2        | present               | present               |
| Gene 3        | absent                | present               |
| Gene 4        | present               | absent                |
| Gene 5        | absent                | absent                |

The number of genes containing a TATA box in only one species is 2, and the number of genes containing a TATA box in either one of the two species is 3. We define the pathway TATA box disparity to be  $2/3 = 0.67$ .

reports the statistic on all 68 pathways compared across the four yeast species, ranging from 0.33 to 1.

### 3.3.3 Normalized pathway interaction heterogeneity

To satisfy the conditions for linear regression of pathway heterogeneity on pathway TATA box disparity shown in the main text, we normalized the  $Q_d$  to  $Q_d^*$ -statistic that is comparable across pathways with different degrees of freedom. Additionally, the linear regression residual qualitatively follows a normal distribution for the model significance to be evaluated using an  $F$ -distribution.

After computing the pathway heterogeneity  $Q$ -statistic using the expression data of four yeast species under various stresses (Tirosh et al., 2006), we normalized the  $Q_d$ -statistics from  $Q$ -method to  $Q_d^*$  for each pathway between two species using the following transformation (Laubscher, 1960):

$$Q_d^* = \frac{\sqrt{2v_d - 1} \cdot \sqrt{u_d Q_d / v_d} - \sqrt{2u_d - 1}}{\sqrt{u_d Q_d / v_d} + 1} \quad (\text{S6})$$

where  $Q_d$  is the original pathway  $F$ -statistic, and  $u_d$  and  $v_d$  are the numerator and denominator degrees of freedom defined in the main text, respectively.

The normalized pathway heterogeneity and TATA box disparity for all 68 pathways across all 6 pairs of species are shown in Table S4. The scatterplot of these two measures is shown in Figure 6 in the main text. A linear regression analysis shows that normalized pathway heterogeneity  $Q_d^*$  and pathway TATA box disparity have a strong association with Pearson correlation  $r = 0.47$  at a statistical significance level of  $P = 1.09 \times 10^{-23}$ .

### 3.3.4 Pathway interaction heterogeneity is consistent with TATA box disparity among yeast species

It has been shown that RNA polymerase (RNAP) II and III both interact with the TATA box as a basal level promoter element (Wang et al., 1996; Moshonov et al., 2008; Rhee and Pugh, 2012; Savinkova et al., 2013). Wang et al. (1996) also showed that point mutations within TATA box sequences directly affected the affinity for RNAP II and III. Furthermore the pattern of nucleotides of the first five positions may be responsible for RNAP selection, as RNAPIII demonstrated higher affinity for tandem T residues and RNAPII showed a higher affinity for alternating T-A residues. TATA box-binding proteins (TBP) which associate the TATA box with RNAP have been shown to affect transcription

levels (Shen et al., 1998). The TBP Brf in yeast promotes transcription of the U6 snRNA gene, and when a loss of function Brf mutant is introduced transcription by RNAPII drops to basal levels (Shen et al., 1998). While transcription is not inhibited by a loss of function TBP or absence of a TATA box it can be reduced to basal levels as stability of the RNAP promoter complex is reduced.

The association between normalized pathway heterogeneity computed from the transcriptomes and pathway TATA box disparity from the genomes between species differed among pathways, but showed a statistically significant positive correlation (Figure 6 in the main text). Some pathways such as alanine, aspartate, and glutamate metabolism have both low pathway heterogeneity and low pathway TATA box disparity. Nitrogen metabolism showed a remarkable positive correlation between normalized pathway heterogeneity and pathway TATA box disparity. Pathways with low heterogeneity may not be similar due to necessity but rather have not had sufficient time to diverge. Many pathways observed displayed a 100% TATA box disparity like various types of N-glycan biosynthesis and folate biosynthesis with heterogeneity values of 10.68 and 6.95, respectively. It is possible that some pathways are more plastic than others in regards to variations in promoter regions and gene expression, while others are more rigid and under strict purifying selection. While high pathway heterogeneity and high pathway TATA box disparity is a trend generally observed, it is interesting to note how pathways such as nitrogen metabolism, between two species can be highly conserved or divergent and the opposite is true between two other species. Therefore, similarities between the same pathway in two species may not be the result of purifying selection but rather a lack of divergence.

However, some highly conserved pathways such as glycolysis and gluconeogenesis with low heterogeneity (-9.48) showed a relatively high TATA box disparity (59%) among TATA-containing genes and were considered outliers. Glycolysis and gluconeogenesis are vital metabolic pathways necessary for the regulation of glucose metabolism and anabolism. It appears that TATA boxes in the genes in these pathways are not conserved among the species. This suggests that other expression regulatory elements, for example, evolution of DNA-binding domains of transcription factors (Babu et al., 2004), and evolution of regulatory DNA motifs (Gerland and Hwa, 2002), may be involved which maintain similar expression levels between species and may explain such outliers. The citric acid cycle (TCA), another vital metabolic pathway responsible for the generation of NADH and FADH<sub>2</sub> for the electron transport chain, and generation of ATP, appeared to have relatively low heterogeneity (-4.43 to -8.82) and moderate TATA box disparity (50-67%). These discrepancies imply that pathway conservation does not always directly depend on TATA box conservation, and other regulatory elements may compensate for variations in TATA boxes to maintain expression integrity within a pathway.

A general trend of high heterogeneity of expression and high TATA box disparity can be seen when all pathways are compared. Outliers indicate that while strict purifying selection may exist for some genes, others have a higher degree of promoter region plasticity and the presence or absence of a TATA box may not accurately predict expression. While *in silico* expression prediction cannot be determined solely on the presence or absence of a TATA box, there is a correlation which lends confidence to such a prediction.

The TATA box disparity observed is consistent with the conclusion in (Tirosh et al., 2006) that as species diverge TATA box disparity increases. The expression levels of homologs between species varied as did the presence of TATA box regions. Tirosh et al. (2006) concluded that variability within promoter regions is the driving force of the evolution of gene expression variability. While the pathways themselves have remained relatively conserved, expression levels between species are variable as are their promoter regions. The correlation between low heterogeneity and low TATA box disparity while not always consistent implies that some genes may rely on a TATA box more than others for expression above basal levels. Differential gene expression between species may be partially explained by pathway rewiring through TATA box variations in presence, sequence, and position near the promoter and offer a possible mechanism for explaining phenotypic diversity among species.

## References

- Altschul, S. F., Gish, W., Miller, W., Myers, E. W., and Lipman, D. J. (1990). Basic local alignment search tool. *J. Mol. Biol.*, 215(3):403–410.
- Babu, M. M., Luscombe, N. M., Aravind, L., Gerstein, M., and Teichmann, S. A. (2004). Structure and evolution of transcriptional regulatory networks. *Current Opinion in Structural Biology*, 14(3):283–291.
- Basehoar, A. D., Zanton, S. J., and Pugh, B. (2004). Identification and distinct regulation of yeast TATA box-containing genes. *Cell*, 116(5):699 – 709.

- Borghans, J. M., Dupont, G., and Goldbeter, A. (1997). Complex intracellular calcium oscillations. A theoretical exploration of possible mechanisms. *Biophys Chem*, 66:25–41.
- Chelliah, V., Laibe, C., and Novère, N. L. (2013). BioModels database: a repository of mathematical models of biological processes. *Methods Mol. Biol.*, 1021:189–199.
- Cliften, P., Sudarsanam, P., Desikan, A., Fulton, L., Fulton, B., Majors, J., Waterston, R., Cohen, B. A., and Johnston, M. (2003). Finding functional features in *Saccharomyces* genomes by phylogenetic footprinting. *Science*, 301(5629):71–76.
- Engel, S. R., Dietrich, F. S., Fisk, D. G., Binkley, G., Balakrishnan, R., Costanzo, M. C., Dwight, S. S., Hitz, B. C., Karra, K., Nash, R. S., et al. (2014). The reference genome sequence of *Saccharomyces cerevisiae*: Then and now. *G3*, 4(3):389–398.
- Fung, E., Wong, W. W., Suen, J. K., Bulter, T., Lee, S. G., and Liao, J. C. (2005). A synthetic gene-metabolic oscillator. *Nature*, 435:118–122.
- Fuss, H., Dubitzky, W., Downes, S., and Kurth, M. J. (2006). Bistable switching and excitable behaviour in the activation of Src at mitosis. *Bioinformatics*, 22:158–165.
- Gardner, T. S., Dolnik, M., and Collins, J. J. (1998). A theory for controlling cell cycle dynamics using a reversibly binding inhibitor. *Proc Natl Acad Sci U S A*, 95:14190–14195.
- Gerland, U. and Hwa, T. (2002). On the selection and evolution of regulatory DNA motifs. *Journal of Molecular Evolution*, 55(4):386–400.
- Hynne, F., Danø, S., and Sørensen, P. G. (2001). Full-scale model of glycolysis in *Saccharomyces cerevisiae*. *Biophys Chem*, 94:121–163.
- Kellis, M., Patterson, N., Endrizzi, M., Birren, B., and Lander, E. S. (2003). Sequencing and comparison of yeast species to identify genes and regulatory elements. *Nature*, 423(6937):241–254.
- Laubscher, N. F. (1960). Normalizing the noncentral  $t$  and  $F$  distributions. *Ann. Math. Statist.*, 31(4):835–1254.
- Leloup, J. and Goldbeter, A. (1999). Chaos and birhythmicity in a model for circadian oscillations of the PER and TIM proteins in *Drosophila*. *Journal of Theoretical Biology*, 198:445–459.
- Leloup, J. C. and Goldbeter, A. (2003). Toward a detailed computational model for the mammalian circadian clock. *Proc Natl Acad Sci U S A*, 100:7051–7056.
- Moshonov, S., Elfakess, R., Golan-Mashiach, M., Sinvani, H., and Dikstein, R. (2008). Links between core promoter and basic gene features influence gene expression. *BMC Genomics*, 9(1):92.
- Nielsen, K., Sørensen, P. G., Hynne, F., and Busse, H. G. (1998). Sustained oscillations in glycolysis: an experimental and theoretical study of chaotic and complex periodic behavior and of quenching of simple oscillations. *Biophys Chem*, 72:49–62.
- Ouyang, Z., Song, M., Güth, R., Ha, T. J., Larouche, M., and Goldowitz, D. (2011). Conserved and differential gene interactions in dynamical biological systems. *Bioinformatics*, 27(20):2851–2858.
- Rhee, H. S. and Pugh, B. F. (2012). Genome-wide structure and organization of eukaryotic pre-initiation complexes. *Nature*, 483(7389):295–301.
- Savinkova, L., Drachkova, I., Arshinova, T., Ponomarenko, P., Ponomarenko, M., and Kolchanov, N. (2013). An experimental verification of the predicted effects of promoter TATA-box polymorphisms associated with human diseases on interactions between the TATA boxes and TATA-binding protein. *PLoS ONE*, 8(2):e54626.
- Shen, Y., Kassavetis, G. A., Bryant, G. O., and Berk, A. J. (1998). Polymerase Pol III TATA box-binding protein (TBP)-associated factor Brf binds to a surface on TBP also required for activated Pol II transcription. *Mol. Cell. Biol.*, 18(3):1692–1700.

- Soetaert, K., Petzoldt, T., and Setzer, R. W. (2010). Solving differential equations in R: package deSolve. *J. Stat. Softw.*, 33(9):1–25.
- Tirosh, I., Weinberger, A., Carmi, M., and Barkai, N. (2006). A genetic signature of interspecies variations in gene expression. *Nat. Genet.*, 38(7):830–834.
- Tyson, J. J. (1991). Modeling the cell division cycle: cdc2 and cyclin interactions. *P. Natl. Acad. Sci. USA*, 88:7328–7332.
- Vilar, J. M., Kueh, H. Y., Barkai, N., and Leibler, S. (2002). Mechanisms of noise-resistance in genetic oscillators. *Proc Natl Acad Sci U S A*, 99:5988–5992.
- Wang, Y., Jensen, R. C., and Stumph, W. E. (1996). Role of TATA box sequence and orientation in determining RNA polymerase II/III transcription specificity. *Nucleic Acids Res.*, 24(15):3100–3106.
